1 **TNF $\alpha$  increases Tyrosine Hydroxylase expression in human monocytes**

2

3 Adithya Gopinath<sup>\*a1</sup>, Martin Badov<sup>a1</sup>, Madison Francis<sup>a1</sup>, Gerry Shaw<sup>1,2</sup>, Anthony Collins<sup>1</sup>,  
4 Douglas R. Miller<sup>1</sup>, Carissa A. Hansen<sup>1</sup>, Phillip Mackie<sup>1</sup>, Malú Gámez Tansey<sup>1</sup>, Abeer Dagra<sup>1</sup>,  
5 Irina Madorsky<sup>2</sup>, Adolfo Ramirez-Zamora<sup>3</sup>, Michael S. Okun<sup>1,3</sup>, Wolfgang J. Streit<sup>1</sup>, Habibeh  
6 Khoshbouei<sup>1</sup>

7

8 1-University of Florida, Department of Neuroscience, Center for Translational Research in  
9 Neurodegenerative Disease, Norman Fixel Institute for Neurological Diseases

10 2-Encor Biotechnology Inc. 4949 SW 41<sup>st</sup> Blvd Suite 40, Gainesville FL 32608

11 3-University of Florida, Department of Neurology

12 <sup>a</sup> equal contribution

13

14 Corresponding Author:

15 \*Adithya Gopinath

16 [adithya@ufl.edu](mailto:adithya@ufl.edu)

17

18 Number of Tables: 4

19 Number of Figures: 7

20 Number of Supplemental Figures/Tables: 3

21 Number of References: 92

22

23 Abbreviations: No non-standard abbreviations used

24

25

26 **Abstract**

27 Most, if not all, peripheral immune cells in humans and animals express tyrosine  
28 hydroxylase (TH), the rate limiting enzyme in catecholamine synthesis. Since TH is typically  
29 studied in the context of brain catecholamine signaling, little is known about changes in TH  
30 production and function in peripheral immune cells. This knowledge gap is due, in part, to the  
31 lack of an adequately sensitive assay to measure TH in immune cells expressing lower TH  
32 levels compared to other TH expressing cells. Here, we report the development of a highly  
33 sensitive and reproducible Bio-ELISA to quantify picogram levels of TH in multiple model  
34 systems. We have applied this assay to monocytes isolated from blood of persons with  
35 Parkinson's disease (PD) and to age-matched, healthy controls. Our study unexpectedly  
36 revealed that PD patients' monocytes express significantly higher levels of TH protein in  
37 peripheral monocytes relative to healthy controls. Tumor necrosis factor ( $TNF\alpha$ ), a pro-  
38 inflammatory cytokine, has also been shown to be increased in the brains and peripheral  
39 circulation in human PD, as well as in animal models of PD. Therefore, we investigated a  
40 possible connection between higher levels of TH protein and the known increase in circulating  
41  $TNF\alpha$  in PD. Monocytes isolated from healthy donors were treated with  $TNF\alpha$  or with  $TNF\alpha$  in  
42 the presence of an inhibitor. Tissue plasminogen activator (TPA) was used as a positive control.  
43 We observed that  $TNF\alpha$  stimulation increased both the number of TH+ monocytes and the  
44 quantity of TH per monocyte, without increasing the total numbers of monocytes. These results  
45 revealed that  $TNF\alpha$  could potentially modify monocytic TH production and serve a regulatory  
46 role in peripheral immune function. The development and application of a highly sensitive assay  
47 to quantify TH in both human and animal cells will provide a novel tool for further investigating  
48 possible PD immune regulatory pathways between brain and periphery.

49 **Introduction**

50 Human and animal studies have shown that most if not all immune cells possess  
51 components necessary to release, uptake, synthesize, and respond to catecholamines including  
52 dopamine and norepinephrine (NOR). These components activate signaling cascades that  
53 change the phenotype and function of cells in both healthy and in disease conditions. Immune  
54 cells may thus both come in contact with physiological levels of catecholamines derived from  
55 peripheral tissues and also serve as a source for catecholamines. Tyrosine hydroxylase (TH)  
56 catalyzes the conversion of tyrosine to 3,4-dihydroxyphenylalanine (L-DOPA), which is the rate-  
57 limiting step in the synthesis of dopamine, norepinephrine (NOR) and epinephrine<sup>1,2</sup>. Although  
58 primarily studied in the central nervous system<sup>3,4</sup>, TH is expressed in the majority of peripheral  
59 immune cells<sup>5-9</sup>, and many peripheral tissues<sup>10</sup>, including kidney<sup>11,12</sup>, heart<sup>13</sup> and adrenal  
60 cortex<sup>14-16</sup>. Both myeloid and lymphoid lineages of human peripheral immune cells express  
61 TH<sup>17,18</sup>, which is thought to regulate dopamine levels within these cells<sup>9</sup>. Beyond protein  
62 expression, TH activity is regulated by a variety of post-translational modifications and that can  
63 regulate TH function. For example, phosphorylation, ubiquitination, nitration and S-  
64 glutathionylation can all affect TH activity independent of TH levels<sup>19-26</sup>. As the key to  
65 catecholamine production, TH activity and its relative expression are commonly studied in  
66 diseases in which catecholamine tone, synthesis and signaling are altered. These disease  
67 states include bipolar disorder, addiction, schizophrenia, attention deficit hyperactivity (ADHD)  
68 and neurodegenerative conditions including Parkinson's disease (PD).

69 The lack of a robust and sensitive assay to measure low levels of TH protein has  
70 hampered the field's ability to investigate TH protein levels in peripheral immune cells in  
71 diseases characterized by altered catecholamine tone. For example, in PD, due to its spatially  
72 restricted expression, decreases in TH levels in the basal ganglia are readily detectable<sup>27,28</sup>,  
73 whereas changes in TH levels in other brain regions (i.e., amygdala, hippocampus, cortical  
74 regions) are reported in the later stages of PD<sup>29,30</sup>. In contrast, very low TH levels in countless  
75 immune cells spread across the body has made it difficult to study TH protein levels in

76 peripheral immune cells. For example, indirect TH measurements via qPCR reveal that PD  
77 patients show significantly less midbrain TH mRNA compared to healthy controls subjects ( $5.5 \pm$   
78  $1.4$  in healthy controls, vs.  $1.5 \pm 0.9$  attomole/microgram total RNA in PD)<sup>31</sup>. In contrast, TH  
79 mRNA is not detectable in unstimulated immune cells<sup>32</sup>. TH protein expression in the substantia  
80 nigra is in excess of 200ng TH per milligram protein<sup>33</sup>, and is decreased in patients with PD.  
81 However, to our knowledge no reports directly quantify TH protein in immune cells.

82 In order to investigate whether the characteristically reduced TH expression in PD  
83 central nervous system (CNS) is recapitulated in peripheral immune cells, we established a  
84 sensitive assay to quantify TH protein. We then applied the assay to analyze TH production in  
85 peripheral blood monocytes. The sensitivity of our Bio-ELISA was a thousand-fold above  
86 traditional detection methods, and when we measured TH level in peripheral monocytes from  
87 healthy controls and from PD, we observed a significant elevation of TH levels in PD monocytes  
88 versus controls. This observation was contrary to our *a priori* hypothesis. The unexpected  
89 discovery of increased TH protein in peripheral PD monocytes prompted investigation into the  
90 potential underlying mechanism. In the PD literature, there is a strong consensus that  
91 neuroinflammatory cytokines, including  $TNF\alpha$  and IL6 are increased in CSF and serum of PD  
92 patients and of animal models of PD<sup>27,34-42</sup>. Therefore, we investigated whether *ex vivo* exposure  
93 to  $TNF\alpha$  or IL6 increases the number of TH+ monocytes and/or amount of TH protein per  
94 monocyte. We found that exposure to  $TNF\alpha$ , but not IL6 increased both the number of TH+  
95 monocytes and the quantity of TH protein per cell.

## 96 **Results and discussion**

### 97 **Bio-ELISA successfully and reproducibly detects recombinant and native TH.**

98 To test the hypothesis that similar to CNS in PD, TH expression is reduced in peripheral  
99 blood monocytes, we first established a sensitive assay to quantify TH levels in monocytes from  
100 healthy controls, as well as various reference TH expressing systems. Given the plethora of

101 biological systems expressing TH, there is an unmet need for a sensitive and reliable assay to  
102 quantify TH levels which with broad biological implications in basic science, preclinical and  
103 clinical research. To date, measurement of TH levels in midbrain neurons has been  
104 accomplished by immunohistochemistry, and Western blot<sup>62-65</sup>, while TH levels in peripheral  
105 immune cells has been assayed by flow cytometry<sup>51</sup>. Although reliable, these methods share a  
106 common shortcoming in that they are semi-quantitative at best, and at worst only indicate the  
107 presence or absence of TH. This led us to develop a highly sensitive and fully quantitative  
108 enzyme-linked immunosorbent assay (Bio-ELISA) to measure TH protein levels.

109 Quantification of TH using Bio-ELISA depends on the availability of purified TH and high-  
110 quality antibodies against TH, preferably generated in two distinct host species. A panel of  
111 monoclonal and polyclonal antibodies were generated against full length recombinant human  
112 TH (Figure 1A), and quality assessment was performed by standard ELISA, Western blotting,  
113 and appropriate cell and tissue staining. These novel antibodies behaved in all respects  
114 similarly to a widely used commercial TH antibody (Figure 1B, AB152, Millipore-Sigma)<sup>66-69</sup>. A  
115 mouse monoclonal antibody, MCA-4H2, and a rabbit polyclonal, RPCA-TH, were selected as  
116 ELISA capture and detection antibodies, respectively.

117 Next, TH recombinant protein band identity was compared to TH expression in PC12  
118 cells (Figure 1C). As predicted, PC12 lysate shows a single TH band at ~63 kDa, with a  
119 corresponding band for the TH recombinant protein at ~70 kDa. The observed difference in  
120 molecular weight between TH expressed in PC12 cells and recombinant TH protein is due to  
121 the additional 5.7kDa N-terminal His-tag. Lower molecular weight bands (at 50kDa and 35kDa,  
122 Figure 1B-E, Supplementary Figure 1) represent proteolytic cleavage products of mammalian  
123 TH when expressed in a prokaryotic system. Both MCA-4H2 and RPCA-TH reliably detect both  
124 recombinant TH and native TH in PC12 lysates (Figure 1 C, D).

125 Since antibody specificity is crucial for developing a novel assay, we rigorously  
126 confirmed their specificity. First, MCA-4H2 and RPCA-TH were used to stain human and murine

127 midbrain tissue (Figure 2). MCA-4H2 (Figure 2A) and RPCA-TH (Figure 2B) both showed high  
128 specificity for TH+ dopamine neurons in both human and murine tissues with no visible  
129 background. In addition, both secondary-only and isotype control staining show minimal  
130 background (Figure 2A-B, top and second panels). Lastly, both MCA-4H2 and RPCA-TH were  
131 tested via Western blot using standard immunoblotting as well as blocking peptide/absorption  
132 controls (Figure 2C-D). Both antibodies show good specificity and minimal background. CHO  
133 cells, used as the negative control since they do not express TH, show no TH band (Figure 2C).  
134 The peptide blocking/absorption control groups (Figure 2D) also show no detectable signal,  
135 further confirming specificity.

136         Next, we prepared 1:1 serial dilutions of TH recombinant protein in Laemmli buffer, from  
137 6ug/mL to 0.094ug/mL, to test the limits of detection using the Licor IR imaging system for  
138 Western blot (Figure 1E) using commercially available TH antibody AB152. While effective,  
139 detection *via* Licor Odyssey using an IR fluorescent dye affords a fixed lower detection limit of  
140 ~15ng, suggesting that IR fluorescent imaging is suitable for high expressing systems, but  
141 unsuitable for accurate quantification at low nanogram or picogram TH levels, reinforcing the  
142 need for a more sensitive, quantitative TH Bio-ELISA.

143         To quantify TH expression in control conditions, we first attempted a standard sandwich  
144 ELISA approach (Figure 1F), in which MCA-4H2 was used as the capture antibody, followed by  
145 incubation with recombinant TH, then RPCA-TH as detection antibody. Enzyme-based detection  
146 was accomplished by addition of HRP-conjugated secondary (goat anti-rabbit HRP, Vector,  
147 BA1000). While this reliably quantified TH, the standard version of this assay produced a lower  
148 detection threshold of 125pg/mL TH. We sought to further increase sensitivity of the assay by  
149 addition of a biotin-avidin amplification step (Avidin-HRP, Vector, A2004) (Figure 1G), which  
150 provided an improved lower threshold of 62.5pg/mL. A further refinement was the biotinylation  
151 of the rabbit detection antibody using Sulfo-NHS-LC-biotin (Thermo Scientific A39257) which  
152 improved sensitivity further by reducing background and producing a lower-threshold of

153 detection at 15pg/mL (Figure 1H) with biotinylated antibodies, hence the Bio-ELISA designation.  
154 We found that our Bio-ELISA is around one thousand-fold more sensitive than infrared Western  
155 blot imaging (15 pg/mL vs. 15 ng/mL). Both TH antibodies are available commercially from  
156 EnCor Biotechnology Inc.

157 **Antibodies MCA-4H2 and RPCA-TH reliably detect both native and denatured TH in**  
158 **mouse and human tissue.** Aiming to develop a novel and reliable ELISA for both human and  
159 murine tissues, we next sought to confirm specificity of these antibodies on native and  
160 denatured tissues from both human and mouse brain regions rich in tyrosine hydroxylase  
161 (Figure 2). MCA-4H2 (Figure 2A) and RPCA-TH (Figure 2B) detect TH+ cell bodies and  
162 neuronal processes in both human and mouse midbrain. Minimal non-specific staining detected  
163 in secondary only and isotype controls, further confirming antibody specificity. Similarly, both  
164 MCA-4H2 and RPCA-TH detect denatured TH on Western blot (Figure 2C) following separation  
165 on SDS-PAGE, with minimal non-specific bands in the negative control (parental CHO cell  
166 homogenate). HSP60 is shown as a loading control. As an additional validation step to confirm  
167 the specificity of MCA-4H2 and RPCA-TH, primary antibodies were pre-incubated with  
168 recombinant TH protein (blocking peptide/absorption control) and show no observable signal  
169 (Figure 2D).

170 **TH Bio-ELISA reliably quantifies TH in PC12 cells, human macrophages, and cultured**  
171 **murine dopamine neurons.** Having established a reliable method with a suitably low detection  
172 threshold, we tested the TH Bio-ELISA on cell homogenates prepared from PC12 cells, HEK293  
173 cells, cultured primary human macrophages derived from whole blood samples from healthy  
174 donors, and primary cultures of midbrain dopamine neurons prepared from PND0-PND3 mouse  
175 pups. PC12 cells are known to express high levels of TH<sup>48</sup>, while HEK293 serve as negative  
176 control<sup>45,70</sup>. Cultured midbrain dopamine neurons are known to express TH as the rate limiting  
177 enzyme for dopamine<sup>47</sup> while cultured human monocyte-derived-macrophages express TH  
178 protein and mRNA<sup>9,43</sup>.

179 TH expression is shown as unit TH (picogram or nanogram) per mg total protein, as  
180 determined by the Lowry assay. PC12 homogenate provided a reliable positive control  
181 expressing high levels of TH (>10ng TH/mg total protein), while HEK293 homogenate showed  
182 no detectable levels of TH, in at least 6 independent replicates. As anticipated, cultured  
183 dopamine neurons from postnatal mice showed greater TH concentrations (~700pg TH/mg total  
184 protein) than cultured human macrophages (~300pg TH/mg total protein) (Figure 3A),  
185 suggesting the Bio-ELISA is applicable to cell and tissue samples derived from human and  
186 murine specimens, paving the way for its application in translational and preclinical studies  
187 involving measurements of TH protein. We should note that unlike cultured human monocyte-  
188 derived-macrophages, cultured dopamine neurons contain various cell types, and consist of 12-  
189 16% dopamine neurons. The remainder are GABAergic neurons and supporting cells (microglia  
190 and astroglia)<sup>71-73</sup>. Thus we believe that TH levels are much higher in a single dopamine neuron  
191 than in a macrophage. Visual representation of relative TH expression in PC12, HEK293,  
192 human macrophage and primary neuron homogenates are plotted on a representative standard  
193 curve (Figure 3B). Raw values [TH] in ng/mL calculated from absorbance are shown in Figure  
194 3C, alongside each sample ID. Raw TH concentration was divided by [Protein], then multiplied  
195 by 1,000 to produce values in pg TH/mg total protein (Figure 3C).

196 To further confirm the specificity of these antibodies, the Bio-ELISA was tested using  
197 absorption controls (Figure 4). In multiple independent replicates, a single ELISA plate was  
198 prepared as shown in Figure 4A (Bio-ELISA, blue; absorbed MCA-4H2, orange; absorbed  
199 RPCA-TH, green), and incubated with PC12 lysate as a positive control. Following peptide  
200 blocking/absorption of either capture or detection antibody, PC12 cell lysate yields no detectable  
201 TH (orange and green arrows, Figure 4B), while the TH Bio-ELISA (blue arrow) recapitulates TH  
202 concentrations measured in PC12 cells (compare Figure 3 panel A-B with Figure 4 panel B).

203



204 **Contrary to our hypothesis, monocytes isolated from blood of PD patients show**  
205 **increased TH protein relative to age-matched healthy controls.** PD is a disease in which  
206 monoamine signaling is affected in both CNS and peripheral immune cells<sup>9</sup>. The literature  
207 supports the hypothesis that similar to the CNS, peripheral TH expression is altered, but there is  
208 no reliable information about the direction of this change. Since peripheral immune cells  
209 including PBMCs express the machinery for catecholamine synthesis, including TH, they  
210 provide a biologically relevant peripheral tissue preparation to investigate TH levels in  
211 monocytes of PD patients and age-matched healthy subjects. Monocytes for each subject were  
212 isolated from 20 million total peripheral blood mononuclear cells (PBMCs) using anti-CD14  
213 magnetic isolation per manufacturer's instructions. Purified monocytes were immediately lysed  
214 and assayed *via* Bio-ELISA for TH concentration following total protein quantification. Of 11  
215 healthy control samples included, only three registered TH concentrations above the detection  
216 threshold. By contrast, all 11 PD patients recruited for this study show clear positive TH values  
217 that were significantly higher than healthy controls. These data suggest that, contrary to our  
218 original hypothesis, PD monocytes express significantly more TH protein relative to healthy  
219 control subjects (Fig 5A - n=11, t[20]=3.777, P=0.0012). Mean TH protein concentrations in PD  
220 monocytes are shown on a representative standard curve (Figure 5B), along with raw data used  
221 to calculate TH concentrations (Figure 5C). While these data represent a snapshot of TH levels  
222 in circulation PD monocytes, we cannot make any overarching claims that TH levels in  
223 monocytes precede clinical symptoms of PD, or predict a PD diagnosis. A larger sample  
224 numbers and longitudinal studies can test these possibilities. Nevertheless, these data suggest  
225 that in peripheral monocytes of Parkinson's patients, the rate limiting protein involved in  
226 catecholamines synthesis is increased. Investigating the potential mechanism was the focus of  
227 the next set of experiments.

228 **TNF $\alpha$  increases number of TH+ monocytes, and the amount of TH protein per monocyte.**

229 There is strong evidence in the literature for increased TNF $\alpha$  in PD<sup>27,34-36</sup> including in the brain,

230 cerebrospinal fluid, and serum of Parkinson's patients<sup>27</sup> as well as in Parkinsonian mice<sup>37,38</sup>.  
231 These reports suggest that TNF $\alpha$  plays a role in the often hypothesized peripheral inflammation  
232 in PD<sup>74-79</sup>, which is also documented in other inflammatory states including rheumatoid  
233 arthritis<sup>80,81</sup> and multiple sclerosis<sup>7</sup>, where TH expression is linked to TNF $\alpha$  expression<sup>80,81,7</sup>.  
234 Therefore, we tested the hypothesis that *ex vivo* stimulation of monocytes from healthy subjects  
235 with TNF $\alpha$  stimulates TH expression, as measured by changes in the number of TH-expressing  
236 monocytes, and/or the amount of TH per monocyte. We employed flow cytometry to address the  
237 former, and bio-ELISA to address the latter. Two million monocytes isolated from whole blood of  
238 healthy donors were treated for 4 hours with tissue plasminogen activator (TPA, 100ng/mL,  
239 positive control for increased monocyte TH expression<sup>7</sup>), TNF $\alpha$  (17ng/mL)<sup>61</sup> and compared with  
240 monocytes treated with vehicle (Figure 6A). Monocytes were assayed for TH expression by two  
241 complementary methods: flow cytometry<sup>51</sup> (Figure 6B-F) and ELISA (Figure 6G-H). We should  
242 note that because a prolonged TNF $\alpha$  exposure can induce cell toxicity<sup>82-86</sup>, we tested multiple  
243 treatment durations. We found that a 4-hour TNF $\alpha$  (17ng/mL)<sup>61</sup> treatment had a minimal effect  
244 on cell viability; whereas, a longer TNF $\alpha$  exposure substantially decreased cell viability.  
245 Therefore, a 4-hour treatment strategy was selected in this study.

246 To control for donor variability, we added identical quantities of counting beads as a  
247 reference. The number of TH+ monocytes was quantified by flow cytometry (Figure 6B, left) in  
248 two experimental groups: TPA-treated and TNF $\alpha$ -treated. Monocytes in each condition were  
249 gated to isolate single cells expressing TH (Figure 6B). Raw counts of monocytes in each  
250 condition revealed increased monocytes expressing TH after treatment with TPA or TNF $\alpha$   
251 (Figure 6D), while the number of TH+ monocytes per microliter (Figure 6C) are significantly  
252 increased relative to vehicle (Figure 6E; N=3, F(2,6)=0.364, p=0.0018), suggesting that the  
253 number of TH+ monocytes increase following treatment with TNF $\alpha$  or positive TPA control. A  
254 possible mechanism for this observation is either monocyte proliferation during the treatment

255 period or an altered monocyte phenotype in response to  $\text{TNF}\alpha$ , with no change in total number  
256 of monocytes. In other words, following  $\text{TNF}\alpha$  treatment, TH+ monocytes may either be  
257 increasing in number (proliferation) or existing monocytes upregulate TH expression and  
258 become TH+ (phenotypic change). While a four-hour exposure to  $\text{TNF}\alpha$  is an insufficient time  
259 period to induce proliferative events in immune cells<sup>74</sup>, we could not confidently rule out these  
260 possibilities without additional analyses. Therefore, we quantified monocyte proliferation by  
261 comparing the total number of monocytes per microliter of untreated vs.  $\text{TNF}\alpha$  treated  
262 experimental group. We found the total number of monocytes per microliter to be unchanged  
263 (Figure 6F). While these results suggest that monocyte proliferation did not occur in response to  
264  $\text{TNF}\alpha$ , the results of simple cell counts are not definitive. We elected to take a more rigorous  
265 approach and assess Ki67 expression as a measure of cell proliferation<sup>87</sup>. Ki67 expression in  
266  $\text{TNF}\alpha$  treated monocytes relative to vehicle-treated controls revealed no change in Ki67  
267 expression following  $\text{TNF}\alpha$  treatment (Figure 6I). Thus, these results showed phenotypic  
268 changes in monocytes, but not cell proliferation in response to  $\text{TNF}\alpha$ . While this finding explains  
269 our earlier observation of increased numbers of TH+ cells, the potential phenotypic shift  
270 following  $\text{TNF}\alpha$  mediated immune stimulation was an unpredicted and novel finding.

271 Our flow cytometry data strongly support the conclusion that  $\text{TNF}\alpha$  increases numbers of  
272 TH+ monocytes, but increased number of TH+ monocytes could be due to increased numbers  
273 of cells expressing TH protein, increased quantity of TH protein per cell, or both. In order to  
274 determine whether or not  $\text{TNF}\alpha$  treatment increases quantity of TH protein per monocyte,  
275 identically treated monocytes were lysed and assayed using our TH Bio-ELISA. We found that  
276 four-hour treatments with  $\text{TNF}\alpha$  significantly increased the amount of TH protein (picogram TH  
277 per milligram total protein) above both vehicle and the positive control group (TPA treatment;  
278 Figure 6G; n=5-6 per group,  $F(2,15)=3.297$ ,  $p=0.0001$ ), indicating that exposure to  $\text{TNF}\alpha$  is  
279 sufficient to increase TH protein in human monocytes. Overall, our data show that  $\text{TNF}\alpha$

280 increases both the number of monocytes expressing TH and the quantity of TH expressed by  
281 each cell.

282 **Inhibition of TNF $\alpha$  blocks increase in number of TH+ monocytes and amount of TH per**  
283 **monocyte.** To determine the specificity of TNF $\alpha$  regulation of TH in monocytes, we employed  
284 two approaches. We investigated whether inhibition of TNF $\alpha$  signaling attenuates or blocks the  
285 TNF $\alpha$  mediated increase in TH. In addition, we asked whether or not interleukin-6 (IL6), a  
286 cytokine with pleiotropic effects <sup>71</sup> that is also increased in PD<sup>88-90</sup>, and is associated with non-  
287 motor symptoms of PD <sup>88-90</sup> can also regulate TH expression in the peripheral monocytes. To  
288 test these possibilities, we investigated whether XPro1595, a TNF $\alpha$  inhibitor<sup>91,92</sup>, reduces  
289 monocyte TH expression relative to TNF $\alpha$  treatment alone. In parallel experiments, monocytes  
290 were treated with IL6. Two million monocytes isolated from whole blood of healthy donors  
291 (Figure 7A) were treated with XPro1595 alone (50ng/mL), TNF $\alpha$  (17ng/mL) or TNF $\alpha$  plus  
292 XPro1595 (Figure 7B), IL6 alone (17ng/mL) or IL6 plus XPro1595. The cells were subjected to  
293 flow cytometry or Bio-ELISA. Consistent with the literature <sup>71</sup>, we found relative to TNF $\alpha$   
294 treatment alone, XPro1595 inhibition of TNF $\alpha$  reduced both the number of TH+ monocytes and  
295 the quantity of TH per monocyte (Figure 7C and D), suggesting that soluble TNF $\alpha$  mediates  
296 increased TH in human monocytes. As shown in Figure 7C and 7D, IL6 neither changed the  
297 number of TH+ monocytes nor the quantity of TH per monocyte. We should note that our data  
298 show that TNF $\alpha$  is capable of regulating TH in monocytes whereas other elevated cytokines,  
299 including IL6, are not. Since we have not tested the effect of additional, non-upregulated  
300 cytokines, we cannot claim that what we have shown in this study is exclusively mediated by  
301 TNF $\alpha$ . Instead, we only claim that TNF $\alpha$  is capable of regulating monocytic TH. In addition,  
302 while have not investigated the direct link between increased TH protein in PD monocytes and  
303 TNF $\alpha$ , our *ex vivo* data (Figure 6) support the interpretation that TNF $\alpha$  plays a role in increased  
304 TH expression in immune cells of PD patients.

305  
306  
307  
308  
309  
310  
311  
312  
313  
314  
315  
316  
317  
318  
319  
320  
321  
322  
323  
324  
325  
326  
327  
328  
329

In summary, we developed a highly reproducible and quantitative Bio-ELISA to measure TH protein levels in murine and human cells. Following validation of our assay in multiple TH expression systems, we investigated TH expression in PD immune cells and of age-matched healthy control subjects. We observed that PD patients' monocytes expressed significantly greater amounts of TH per monocyte. Inspired by the literature indicating increased TNF $\alpha$  in PD, we uncovered an intriguing link between TNF $\alpha$  stimulation and increased TH expression in healthy monocytes, which is attenuated by treatment with TNF $\alpha$  inhibitor Xpro1595. Given that TH expression and catecholamine release has been shown to be associated with an anti-inflammatory effect and can mitigate TNF $\alpha$  mediated inflammation, we posit that increased TH expression in monocytes in response to elevated TNF $\alpha$  is a compensatory mechanism. This observation is a step towards understanding the potential underlying mechanism and functional consequence of changes in catecholamines in peripheral immune system in PD. Nevertheless, we acknowledge that one of the limitations of this study was the infeasibility of quantifying TNF $\alpha$  responses in PD monocytes. Whereas, TH can be quantified in a 30 mL blood sample (Figures 3-5), for functional assays (Figures 6 and 7) a large blood volume (~500 mL) is required, which is not feasible in PD subjects. In addition, our data represent merely a snapshot of TH levels present in circulating PD monocytes at a single timepoint; we do not make any claims that elevated levels of TH expressing monocytes precede or predict PD. Larger sample numbers and longitudinal studies can test these possibilities. Nonetheless, the current results raise many interesting questions: Do the circulating TH expressing monocytes reflect changes in central dopamine? Does effective PD therapy reduce the level of TH in peripheral immune cells? Does elevated TH in monocytes predict PD onset or its progression? Future studies will examine these questions and the connections between the peripheral immune system to the brain.

**Methods**

330 **Human subjects:** Human brain tissues were obtained *via* approved IRB protocols  
331 #IRB201800374 and IRB202002059 respectively. Blood samples were obtained at the  
332 University of Florida Center for Movements Disorders and Neurorestoration according to an  
333 IRB-approved protocol (#IRB201701195).

334 **Brain tissues from healthy subjects**

335 Human brain tissues were obtained *via* approved IRB protocols IRB202002059 and  
336 IRB201800374 , from the UF Neuromedicine Human Brain and Tissue Bank (UF HBTB). The  
337 tissues were not associated with identifying information, exempt from consent, therefore no  
338 consent was required. Regions of interest were identified and isolated by a board-certified  
339 neuropathologist.

340 **Blood samples from healthy subjects**

341 Blood samples from age-matched healthy subjects were obtained from two sources: an  
342 approved IRB protocol with written informed consent (IRB201701195), or were purchased from  
343 Lifesouth Community Blood Center, Gainesville, FL from August 2017 to January 2020 as  
344 deidentified samples, and exempt from informed consent (IRB201700339). According to  
345 Lifesouth regulations, healthy donors were individuals aged 50-80 years-old of any gender, who  
346 were not known to have any blood borne pathogens (both self-reported and independently  
347 verified), and were never diagnosed with a blood disease, such as leukemia or bleeding  
348 disorders. In addition, none of the donors were using blood thinners or antibiotics, or were  
349 exhibiting signs/symptoms of infectious disease, or had a positive test for viral infection in the  
350 previous 21 days.

351 **Blood samples from PD patients:**

352 Blood samples were obtained from PD patients (aged 50-80 years-old of any gender) at the  
353 University of Florida Center for Movements Disorders and Neurorestoration according to an  
354 IRB-approved protocol (#IRB201701195), via written informed consent. All recruited patients'  
355 PD was idiopathic. Patients did not have any recorded blood-borne pathogens or blood

356 diseases, nor were they currently taking medications for infections according to their medical  
357 record. In addition, none of the donors were using blood thinners (warfarin, heparin), antibiotics,  
358 over-the-counter (OTC) medications other than aspirin, or were exhibiting signs/symptoms of  
359 infectious disease or had a positive test for viral infection in the previous 21 days. Current  
360 medications are summarized in Supplementary Table 1.

### 361 **TH recombinant protein**

362 Full length human TH protein was expressed from a synthetic cDNA inserted into the *EcoRI* and  
363 *Sall* sites of the pET30a(+) vector and was codon optimized for expression in *E. coli*. The vector  
364 adds an N-terminal His-tag and other vector sequence, a total of 5.7kDa. Expression of the  
365 construct was made by standard methods and purification was performed using the His tag by  
366 immobilized metal affinity chromatography on a nickel column. The TH sequence used in this  
367 study is the human tyrosine 3-monooxygenase isoform shown in Uniprot entry P07101-2.

### 368 **Model systems used for the validation of bio-ELISA**

369 **Human macrophages:** Primary human macrophages were cultured as described  
370 previously<sup>43</sup>. Peripheral blood mononuclear cells (PBMCs) isolated as described below were re-  
371 suspended in RPMI 1640 containing 1% Pen/Strep and 7.5% sterile-filtered, heat-inactivated  
372 autologous serum isolated from the donor's own blood, and plated in 24-well untreated  
373 polystyrene plates at 1 million PBMCs per well. To retain only monocytes/macrophages, cells  
374 were washed after 90 minutes of adherence time to remove non-adherent cells with incomplete  
375 RPMI 1640, followed by replacement with complete media. Media was replaced at days 3 and 6  
376 following culture, and cell lysis performed on day 7 following culture.

377 **Primary murine midbrain dopamine neurons:** Midbrain dopamine neurons strongly  
378 express TH<sup>44</sup> and were used as a positive control group. Acutely dissociated mouse midbrains  
379 from 0-2 day-old male and female pups were isolated and incubated in dissociation medium at  
380 37°C under continuous oxygenation for 90 minutes. Dissociated cells were pelleted by  
381 centrifugation at 1,500xg for 5 min and resuspended and triturated in glial medium (Table 1).

382 Cells were then plated on 12 mm coverslips coated with 0.1 mg/ml poly-D-lysine and 5 µg/ml  
383 laminin and maintained in neuronal media. Every 4 days, half the media was replaced with fresh  
384 media. The materials used for the preparation and maintenance of midbrain neuronal culture  
385 are outlined in Table 1.

386 **Positive and negative control cell lines:** All cell cultures were maintained at 37°C with  
387 5% CO<sub>2</sub> and all cell culture supplies are listed in Table 2. HEK293 cells<sup>45</sup> are not thought to  
388 express TH and so were used as a negative expression control and were cultured as described  
389 previously<sup>46,47</sup>. PC12 cells express TH<sup>48</sup> and were used as a positive control. The cells were  
390 cultured as described by Cartier et al. 2010<sup>49</sup>. CHO cells were cultured as previously  
391 described<sup>50</sup>, and were used as a negative control for TH expression.

#### 392 **PBMC isolation**

393 PBMCs express TH<sup>43,51</sup>. As previously published<sup>51</sup>, whole blood was collected in K2EDTA  
394 vacutainer blood collection tubes (BD, 366643) and held at room temperature for up to 2 hours  
395 prior to PBMC isolation. Briefly, blood from healthy volunteers and PD patients was overlaid in  
396 Leucosep tubes (Table 2) for PBMC isolation, centrifuged for 20 minutes at 400g with brakes  
397 turned off and acceleration set to minimum. PBMCs were collected from the interphase of Ficoll  
398 and PBS, transferred to a fresh 15mL conical tube, resuspended in 8mL sterile PBS and  
399 centrifuged for 10 minutes at 100g, and repeated twice more. Cells were counted with a  
400 hemacytometer using trypan blue exclusion of dead cells, and density-adjusted for downstream  
401 applications.

#### 402 **Magnetic monocyte isolation**

403 PBMCs are composed of multiple cell subsets<sup>52</sup>, each with distinct function and  
404 catecholamine sensitivity<sup>53,54</sup> – for example, lymphocyte regulation by catecholamines dopamine  
405 and NOR<sup>5,6,55</sup> have been studied for several decades<sup>8,18,56,57</sup>, while data regarding  
406 catecholamine function in myeloid lineage cells including monocytes is less abundant. In this  
407 study, we were narrowly focused on studying peripheral monocytes which we and others have



408 previously shown to express TH<sup>9,51,58-60</sup>. Because PBMCs comprise a variety of immune cell  
409 types, we used immunomagnetic enrichment to obtain a greater than 95% CD14+ monocytes  
410 that were utilized in assays described in the current study. Supplementary Figure 2 shows  
411 representative flow cytometry data from routine verification of monocyte enrichment.  
412 (Supplementary Figure 2).

413 CD14+ monocytes express TH<sup>51</sup>. Primary CD14+ monocytes were isolated using  
414 Biolegend MojoSort magnetic isolation kit (Biolegend, 480094) per manufacturer's instructions.  
415 Briefly, 20 million total PBMCs were counted, density adjusted to 1 million cells/uL, resuspended  
416 in MojoSort buffer, and incubated with TruStain Fc-block for 10 minutes at room temperature,  
417 followed by 1:10 anti-CD14 magnetic nanobeads for 15 minutes on ice. Following 2 washes with  
418 2.5mL ice-cold MojoSort buffer, cell pellet was resuspended in 2.5mL MojoSort buffer and  
419 subject to three rounds of magnetic isolation per manufacturer's instructions. The resulting cell  
420 pellet was washed to remove remaining non-CD14+ cells and subject to cell lysis as detailed  
421 below.

#### 422 **Preparation of cell lysates**

423 Adherent cells in culture were lifted using 0.02% EDTA in PBS, diluted with 5 volumes of PBS,  
424 and centrifuged at 100 x *g*. Non-adherent cells (PC12) were centrifuged at 100 x *g* for 5 minutes  
425 at room temperature, and cell pellets were washed 3 times with 5 volumes of sterile PBS.

426 Primary macrophages and primary murine neuron cultures were washed thrice with ice-cold  
427 PBS, on ice. Cell pellets and adherent primary cells were then lysed in ice-cold lysis buffer  
428 (10mM NaCl, 10% glycerol (v/v), 1mM EDTA, 1mM EGTA, and HEPES 20mM, pH 7.6), with  
429 Triton X-100 added to a final concentration of 1%, containing 1x protease inhibitor cocktail  
430 (Millipore-Sigma, 539131) for one hour at 4°C with rotation. Resulting lysate was centrifuged at  
431 12,000 x *g* for 15 minutes at 4°C. Supernatant was set aside for protein quantification by Lowry  
432 assay (Biorad, 5000112) and the remainder was stored at -80°C until use for downstream  
433 assays.

434 **Western blot**

435 Reagents, antibodies and equipment are outlined in Tables 2, 3 and 4. Samples of PC12 lysate  
436 (5ug) and recombinant TH protein (120ng, 60ng, 30ng, 15ng, 7.5ng, 3.75ng, and 1.875ng) were  
437 incubated in Laemmli sample buffer containing 10% beta-mercaptoethanol at 37°C for 30  
438 minutes, separated by SDS-PAGE on 10% bis/polyacrylamide gels, and transferred to  
439 nitrocellulose membranes. After first blocking for 1 hour in TBS-T (50mM Tris-HCl, 150mM  
440 NaCl, and 0.1% Tween 20) containing 5% dry milk (blocking buffer), then incubated with primary  
441 antibody against TH (Table 4) overnight at 4°C. Membranes were then incubated with an  
442 appropriate secondary antibody (Table 4) for 1 hour at room temperature with agitation.  
443 Following all antibody steps, membranes were washed three times for 5 minutes each using  
444 TBS-T. TH was visualized using the Licor Odyssey (Table 2). Absorption controls were  
445 performed as followed: the primary antibodies were pre-incubated with 20ug/mL recombinant  
446 TH protein for 30 minutes on ice, then were used to confirm primary antibody specificity (Table  
447 3, Figure 2C-D).

448 **Immunohistochemistry**

449 Human tissues were sectioned at 40µm on a vibrating microtome and subjected to antigen  
450 retrieval in citrate buffer (10mM citric acid, 2mM EDTA, 2% Tween-20, pH 6.2) at 96°C for 30  
451 minutes, and then allowed to cool to room temperature. PFA-perfused mouse brain tissues were  
452 also sectioned at 40 µm on a vibrating microtome.

453 Human and murine brain tissues were quenched for 20 minutes with 3% hydrogen  
454 peroxide, blocked and permeabilized at 37°C for 1 hour in PBS containing 5% normal goat  
455 serum and 0.5% TritonX-100. Primary antibodies RPCA-TH and MCA-4H2 (1:500 and 1:100  
456 dilution, respectively, Table 4) were incubated overnight, followed by secondaries conjugated to  
457 HRP (1:250, Table 4), incubated for 1 hour at room temperature. Isotype control antibodies  
458 (Biolegend, Table 1) were used to confirm specificity of RPCA-TH and MCA-4H2. Sections were  
459 detected with HRP-substrate NiDAB (Vector Labs, Table 3).

460 **Detection antibody (RPCA-TH) Biotinylation**

461 EZ-Link Sulfo-NHS-LC-Biotin (A39257, Thermo Scientific) at 20-fold molar biotin was used  
462 according to the manufacturer's protocol. Anti-biotin antibody was concentrated to 2mg/mL, pH  
463 was adjusted to 8.0 at room temperature. The conjugate was purified by gel filtration on a  
464 Biorad 10DG column (cat 732-2010) at room temperature.

465 **ELISA for TH**

466 Antibodies used for ELISA are described in Table 1. Ten lanes of an Immulon 4 HBX High-  
467 Binding 96 well plate were coated with 100uL per well of 1:1,000 dilution of 1mg/mL mouse anti-  
468 TH (MCA-4H2) in coating buffer (28.3mM Na<sub>2</sub>CO<sub>3</sub>, 71.42mM NaHCO<sub>3</sub>, pH 9.6) for 20 hours at  
469 4°C. Edge lanes 1 and 12 were left empty. Wells were blocked with 5% fat free milk in 1x TBS  
470 (pH 7.4) for 1 hour at room temperature on an orbital shaker set to 90rpm. To produce a  
471 standard curve, two standard curve lanes were generated, with six serial dilutions, beginning at  
472 10ng/mL and 1ng/mL in TBS-T containing 1% fat free milk (with the last well in each standard  
473 curve lane left with incubation buffer only as a blank. Remaining wells were incubated in  
474 duplicate with 100 microliters of lysates from 1.5 million cells of interest. Incubation was  
475 completed for 20 hours at 4°C on an ELISA shaker set to 475 rpm.

476 After each well was washed and aspirated 6 times with TBS-T, affinity purified polyclonal  
477 rabbit anti-TH (EnCor, RPCA-TH) conjugated to biotin was diluted 1:6,000 from a stock  
478 concentration of 1.65mg/mL in TBS-T with 1% fat-free milk and incubated for 1 hour at room  
479 temperature at 425rpm. 100uL Avidin-HRP (Vector labs, A-2004), diluted 1:2,500 in TBS-T with  
480 1% fat-free milk, was added to each well following washing as described above, and incubated  
481 for 1 hour at room temperature at 425rpm. Following final washes, 150uL room temperature  
482 TMB-ELISA reagent (Thermo Fisher, 34028) was added to each well. The reaction was allowed  
483 to continue for 20 minutes, protected from light, and stopped by addition of 50uL 2N H<sub>2</sub>SO<sub>4</sub>. The  
484 plate was immediately read at 450nm. Absorption controls (Figure 4) were conducted by pre-  
485 incubating MCA-4H2 and RPCA-TH with a 20-fold excess concentration of recombinant TH

486 protein for 30 minutes on ice, prior to addition to the ELISA plate, followed by the remainder of  
487 the protocol described above.

488 Duplicate standard and sample wells were averaged, and background-subtracted based  
489 on blank wells. The concentration of TH for each experimental group was calculated using a  
490 quadratic curve equation calculated in Graphpad Prism 8, then normalized to total protein  
491 concentration per sample as calculated using the Lowry assay. Samples which produced  
492 negative values for TH concentration were considered below detection threshold, and therefore  
493 assigned a value of 0. Final TH values shown are presented as pg TH/mg total protein after  
494 multiplication of the nanogram TH value by 1,000 to show TH as picogram TH/milligram total  
495 protein.

496 ***In vitro* stimulation/treatment with TNF $\alpha$ , tissue plasminogen activator (TPA), TNF $\alpha$**   
497 **inhibitor XPro1595 and IL6**

498 Monocytes were isolated from total PBMCs prepared as described above<sup>51</sup> using  
499 negative selection (Biolegend, 480048) per manufacturer's instructions. Total PBMCs were Fc-  
500 blocked to reduce nonspecific binding, followed by incubations with biotin-conjugated antibody  
501 cocktail containing antibodies against all subsets except CD14 (negative selection), followed by  
502 incubation with magnetic-Avidin beads, allowing all subsets other than CD14+ monocytes to be  
503 bound to the magnet. Monocyte purity/enrichment was routinely verified to confirm that the final  
504 cell population was greater than 95% pure CD14+ cells (Figure S2). CD14+ monocytes were  
505 collected from the supernatant fraction, washed, counted and density adjusted such that 2  
506 million CD14+ monocytes were seeded per well (Figure 5A) and treated for 4 hours with vehicle,  
507 TPA (100ng/mL, Biolegend, 755802)<sup>7</sup>, TNF $\alpha$  (17ng/mL, Biolegend, 570102)<sup>61</sup>, XPro1595  
508 (50ng/mL), or IL6 (17ng/mL) in an ultra-low-adherence 6-well plate (Corning, 3471) to prevent  
509 adherence. Suspended cells from each treatment group were aspirated and placed in a 15mL  
510 conical tube, with any remaining adherent cells detached by incubation with 700uL Accumax

511 solution for 3 minutes (Innovative Cell Technologies, AM105) and added to suspended cells.  
512 After pelleting cells by centrifugation (3 minutes x 100g, room temperature), cells were assayed  
513 by either flow cytometry<sup>51</sup> or lysed for ELISA as stated above (“Preparation of cell lysates”).

514 As previously published<sup>51</sup>, cells for flow cytometry were fixed and permeabilized  
515 (eBioscience, 88-8824-00), and stained for intracellular marker TH (Millipore-Sigma, AB152,  
516 1:100) followed by a species-specific secondary (anti-Rabbit BV421, BD, 565014). After  
517 resuspending the sample in a final volume of 250uL PBS, 5uL of Invitrogen CountBright  
518 Absolute Counting Beads (5000 beads/mL, Invitrogen, C36950) were added just prior to data  
519 acquisition (Sony Spectral Analyzer, SP6800). Monocytes were gated for single cells and  
520 positive TH expression (Figure 5B), and normalized to counting beads in each sample to obtain  
521 an absolute count of TH+ monocytes per uL suspension.

## 522 **Statistics**

523 A two-tailed, unpaired T test was used to compare TH quantity in PD patients versus healthy  
524 control. In this experiment,  $P < 0.05$  was considered statistically significant. One-way ANOVA  
525 with Tukey’s correction for multiple comparisons was used to compare TH-expressing  
526 monocytes assayed by flow cytometry and ELISA following treatment with TPA,  $TNF\alpha$ ,  
527 XPro1595, IL6 or Vehicle.  $P < 0.05$  was considered statistically significant.

528

529

530 **Data Availability**

531 All data will be made available upon reasonable request.

532 **Acknowledgements:** This work was funded by T32-NS082128 (to A.G.), National Center for  
533 Advancing Translational Sciences of the National Institutes of Health under University of Florida  
534 Clinical and Translational Science Awards TL1TR001428 and UL1TR001427 (to A.G.),  
535 R01NS071122-07A1 (to H. K.), NIDA Grant R01DA026947-10, National Institutes of Health Office  
536 of the Director Grant 1S10OD020026-01 (to H. K.), UF-Fixel Institute Developmental Fund,  
537 DA043895 (to H.K.), by the University of Florida McKnight Brain Institute (MBI) (to A.G.), by the  
538 Bryan Robinson Foundation (to A.G.) and by The Karen Toffler Charitable Trust (to A.G.).

539 **Author Contributions**

540 M.F., M.B., G.S., A.C., D.R.M., C.A.H., A.D, and A.G., performed experiments, contributed written  
541 portions, figures and methods to this manuscript. P.M., M.G.T., I.M., A.R.Z., M.S.O., W.J.S., H.K.,  
542 and A.G., supervised, designed experiments in addition to direct contributions to the manuscript.

543 **Competing Interests**

544 The authors declare that they have no financial or non-financial conflicts of interest with the  
545 contents of this article. The content is solely the responsibility of the authors and does not  
546 necessarily represent the official views of the National Institutes of Health.

547

548  
549  
550  
551  
552  
553  
554  
555  
556  
557  
558  
559  
560  
561  
562  
563  
564  
565  
566  
567  
568  
569  
570  
571  
572  
573  
574  
575  
576  
577  
578  
579  
580  
581  
582  
583  
584  
585  
586  
587  
588  
589  
590  
591  
592  
593  
594  
595  
596

## References

- 1 Molinoff, P. B. & Axelrod, J. Biochemistry of catecholamines. *Annu Rev Biochem* **40**, 465-500, doi:10.1146/annurev.bi.40.070171.002341 (1971).
- 2 Nagatsu, T., Levitt, M. & Udenfriend, S. TYROSINE HYDROXYLASE. THE INITIAL STEP IN NOREPINEPHRINE BIOSYNTHESIS. *J Biol Chem* **239**, 2910-2917 (1964).
- 3 Berod, A., Biguet, N. F., Dumas, S., Bloch, B. & Mallet, J. Modulation of tyrosine hydroxylase gene expression in the central nervous system visualized by in situ hybridization. *Proc Natl Acad Sci U S A* **84**, 1699-1703, doi:10.1073/pnas.84.6.1699 (1987).
- 4 Bertler, A. & Rosengren, E. Occurrence and distribution of catechol amines in brain. *Acta Physiol Scand* **47**, 350-361 (1959).
- 5 Marino, F. *et al.* Endogenous catecholamine synthesis, metabolism storage, and uptake in human peripheral blood mononuclear cells. *Exp Hematol* **27**, 489-495 (1999).
- 6 Cosentino, M. *et al.* Endogenous catecholamine synthesis, metabolism, storage and uptake in human neutrophils. *Life Sci* **64**, 975-981, doi:10.1016/s0024-3205(99)00023-5 (1999).
- 7 Cosentino, M. *et al.* Catecholamine production and tyrosine hydroxylase expression in peripheral blood mononuclear cells from multiple sclerosis patients: effect of cell stimulation and possible relevance for activation-induced apoptosis. *J Neuroimmunol* **133**, 233-240, doi:10.1016/s0165-5728(02)00372-7 (2002).
- 8 Cosentino, M. *et al.* Interferon-gamma and interferon-beta affect endogenous catecholamines in human peripheral blood mononuclear cells: implications for multiple sclerosis. *J Neuroimmunol* **162**, 112-121, doi:10.1016/j.jneuroim.2005.01.019 (2005).
- 9 Matt, S. M. & Gaskill, P. J. Where Is Dopamine and how do Immune Cells See it?: Dopamine-Mediated Immune Cell Function in Health and Disease. *J Neuroimmune Pharmacol*, doi:10.1007/s11481-019-09851-4 (2019).
- 10 Weihe, E., Depboylu, C., Schütz, B., Schäfer, M. K. & Eiden, L. E. Three types of tyrosine hydroxylase-positive CNS neurons distinguished by dopa decarboxylase and VMAT2 co-expression. *Cell Mol Neurobiol* **26**, 659-678, doi:10.1007/s10571-006-9053-9 (2006).
- 11 Harris, R. C. & Zhang, M. Z. Dopamine, the kidney, and hypertension. *Curr Hypertens Rep* **14**, 138-143, doi:10.1007/s11906-012-0253-z (2012).
- 12 Wolfowitz, E. *et al.* Derivation of urinary dopamine from plasma dihydroxyphenylalanine in humans. *Clin Sci (Lond)* **84**, 549-557, doi:10.1042/cs0840549 (1993).
- 13 Mohanty, P. K. *et al.* Myocardial norepinephrine, epinephrine and dopamine concentrations after cardiac autotransplantation in dogs. *J Am Coll Cardiol* **7**, 419-424, doi:10.1016/s0735-1097(86)80515-0 (1986).
- 14 Phaner, M. J., Galligan, J. J. & Swain, G. M. Increased catecholamine secretion from single adrenal chromaffin cells in DOCA-salt hypertension is associated with potassium channel dysfunction. *ACS Chem Neurosci* **4**, 1404-1413, doi:10.1021/cn400115v (2013).
- 15 Leszczyszyn, D. J. *et al.* Secretion of catecholamines from individual adrenal medullary chromaffin cells. *J Neurochem* **56**, 1855-1863, doi:10.1111/j.1471-4159.1991.tb03441.x (1991).
- 16 Wightman, R. M. *et al.* Temporally resolved catecholamine spikes correspond to single vesicle release from individual chromaffin cells. *Proc Natl Acad Sci U S A* **88**, 10754-10758, doi:10.1073/pnas.88.23.10754 (1991).
- 17 Gaskill, P. J., Carvallo, L., Eugenin, E. A. & Berman, J. W. Characterization and function of the human macrophage dopaminergic system: implications for CNS disease and drug abuse. *J Neuroinflammation* **9**, 203, doi:10.1186/1742-2094-9-203 (2012).

597 18 Cosentino, M. *et al.* Human CD4+CD25+ regulatory T cells selectively express tyrosine  
598 hydroxylase and contain endogenous catecholamines subserving an autocrine/paracrine  
599 inhibitory functional loop. *Blood* **109**, 632-642, doi:10.1182/blood-2006-01-028423 (2007).

600 19 Lindgren, N. *et al.* Regulation of tyrosine hydroxylase activity and phosphorylation at  
601 Ser(19) and Ser(40) via activation of glutamate NMDA receptors in rat striatum. *J*  
602 *Neurochem* **74**, 2470-2477, doi:10.1046/j.1471-4159.2000.0742470.x (2000).

603 20 Kawahata, I. & Fukunaga, K. Degradation of Tyrosine Hydroxylase by the Ubiquitin-  
604 Proteasome System in the Pathogenesis of Parkinson's Disease and Dopa-Responsive  
605 Dystonia. *Int J Mol Sci* **21**, doi:10.3390/ijms21113779 (2020).

606 21 Congo Carbajosa, N. A. *et al.* Tyrosine hydroxylase is short-term regulated by the  
607 ubiquitin-proteasome system in PC12 cells and hypothalamic and brainstem neurons from  
608 spontaneously hypertensive rats: possible implications in hypertension. *PLoS One* **10**,  
609 e0116597, doi:10.1371/journal.pone.0116597 (2015).

610 22 Johnson, M. E., Salvatore, M. F., Maiolo, S. A. & Bobrovskaya, L. Tyrosine hydroxylase  
611 as a sentinel for central and peripheral tissue responses in Parkinson's progression:  
612 Evidence from clinical studies and neurotoxin models. *Prog Neurobiol* **165-167**, 1-25,  
613 doi:10.1016/j.pneurobio.2018.01.002 (2018).

614 23 Salvatore, M. F., Calipari, E. S. & Jones, S. R. Regulation of Tyrosine Hydroxylase  
615 Expression and Phosphorylation in Dopamine Transporter-Deficient Mice. *ACS Chem*  
616 *Neurosci* **7**, 941-951, doi:10.1021/acschemneuro.6b00064 (2016).

617 24 Wang, Y., Sung, C. C. & Chung, K. K. Novel enhancement mechanism of tyrosine  
618 hydroxylase enzymatic activity by nitric oxide through S-nitrosylation. *Scientific Reports* **7**,  
619 44154, doi:10.1038/srep44154 (2017).

620 25 Daubner, S. C., Le, T. & Wang, S. Tyrosine hydroxylase and regulation of dopamine  
621 synthesis. *Arch Biochem Biophys* **508**, 1-12, doi:10.1016/j.abb.2010.12.017 (2011).

622 26 Blanchard-Fillion, B. *et al.* Nitration and inactivation of tyrosine hydroxylase by  
623 peroxynitrite. *J Biol Chem* **276**, 46017-46023, doi:10.1074/jbc.M105564200 (2001).

624 27 Mogi, M. *et al.* Tumor necrosis factor-alpha (TNF-alpha) increases both in the brain and  
625 in the cerebrospinal fluid from parkinsonian patients. *Neurosci Lett* **165**, 208-210,  
626 doi:10.1016/0304-3940(94)90746-3 (1994).

627 28 Hirsch, E. C. *et al.* The role of glial reaction and inflammation in Parkinson's disease. *Ann*  
628 *N Y Acad Sci* **991**, 214-228, doi:10.1111/j.1749-6632.2003.tb07478.x (2003).

629 29 Harris, J. P. *et al.* Emerging regenerative medicine and tissue engineering strategies for  
630 Parkinson's disease. *NPJ Parkinsons Dis* **6**, 4, doi:10.1038/s41531-019-0105-5 (2020).

631 30 Foffani, G. & Obeso, J. A. A Cortical Pathogenic Theory of Parkinson's Disease. *Neuron*  
632 **99**, 1116-1128, doi:10.1016/j.neuron.2018.07.028 (2018).

633 31 Ichinose, H. *et al.* Quantification of mRNA of tyrosine hydroxylase and aromatic L-amino  
634 acid decarboxylase in the substantia nigra in Parkinson's disease and schizophrenia. *J*  
635 *Neural Transm Park Dis Dement Sect* **8**, 149-158, doi:10.1007/bf02250926 (1994).

636 32 Cosentino, M. *et al.* Stimulation with phytohaemagglutinin induces the synthesis of  
637 catecholamines in human peripheral blood mononuclear cells: role of protein kinase C and  
638 contribution of intracellular calcium. *J Neuroimmunol* **125**, 125-133, doi:10.1016/s0165-  
639 5728(02)00019-x (2002).

640 33 Mogi, M. *et al.* Homospecific activity (activity per enzyme protein) of tyrosine hydroxylase  
641 increases in parkinsonian brain. *J Neural Transm* **72**, 77-82, doi:10.1007/bf01244634  
642 (1988).

643 34 Kouchaki, E. *et al.* Increased serum levels of TNF-alpha and decreased serum levels of  
644 IL-27 in patients with Parkinson disease and their correlation with disease severity. *Clin*  
645 *Neurol Neurosurg* **166**, 76-79, doi:10.1016/j.clineuro.2018.01.022 (2018).



646 35 Rathnayake, D., Chang, T. & Udagama, P. Selected serum cytokines and nitric oxide as  
647 potential multi-marker biosignature panels for Parkinson disease of varying durations: a  
648 case-control study. *BMC Neurol* **19**, 56, doi:10.1186/s12883-019-1286-6 (2019).

649 36 Qin, X. Y., Zhang, S. P., Cao, C., Loh, Y. P. & Cheng, Y. Aberrations in Peripheral  
650 Inflammatory Cytokine Levels in Parkinson Disease: A Systematic Review and Meta-  
651 analysis. *JAMA Neurol* **73**, 1316-1324, doi:10.1001/jamaneurol.2016.2742 (2016).

652 37 McCoy, M. K. & Tansey, M. G. TNF signaling inhibition in the CNS: implications for normal  
653 brain function and neurodegenerative disease. *J Neuroinflammation* **5**, 45,  
654 doi:10.1186/1742-2094-5-45 (2008).

655 38 McCoy, M. K. *et al.* Blocking soluble tumor necrosis factor signaling with dominant-  
656 negative tumor necrosis factor inhibitor attenuates loss of dopaminergic neurons in models  
657 of Parkinson's disease. *J Neurosci* **26**, 9365-9375, doi:10.1523/JNEUROSCI.1504-  
658 06.2006 (2006).

659 39 Lee, J. K., Tran, T. & Tansey, M. G. Neuroinflammation in Parkinson's disease. *J*  
660 *Neuroimmune Pharmacol* **4**, 419-429, doi:10.1007/s11481-009-9176-0 (2009).

661 40 Su, X. *et al.* Synuclein activates microglia in a model of Parkinson's disease. *Neurobiol*  
662 *Aging* **29**, 1690-1701, doi:10.1016/j.neurobiolaging.2007.04.006 (2008).

663 41 Block, M. L. & Hong, J. S. Microglia and inflammation-mediated neurodegeneration:  
664 multiple triggers with a common mechanism. *Prog Neurobiol* **76**, 77-98,  
665 doi:10.1016/j.pneurobio.2005.06.004 (2005).

666 42 Kim, Y. S. & Joh, T. H. Microglia, major player in the brain inflammation: their roles in the  
667 pathogenesis of Parkinson's disease. *Exp Mol Med* **38**, 333-347,  
668 doi:10.1038/emmm.2006.40 (2006).

669 43 Mackie, P. *et al.* The dopamine transporter: An unrecognized nexus for dysfunctional  
670 peripheral immunity and signaling in Parkinson's Disease. *Brain Behav Immun* **70**, 21-35,  
671 doi:10.1016/j.bbi.2018.03.020 (2018).

672 44 Braak, H. & Del Tredici, K. Invited Article: Nervous system pathology in sporadic Parkinson  
673 disease. *Neurology* **70**, 1916-1925, doi:10.1212/01.wnl.0000312279.49272.9f (2008).

674 45 Graham, F. L., Smiley, J., Russell, W. C. & Nairn, R. Characteristics of a human cell line  
675 transformed by DNA from human adenovirus type 5. *J Gen Virol* **36**, 59-74,  
676 doi:10.1099/0022-1317-36-1-59 (1977).

677 46 Goodwin, J. S. *et al.* Amphetamine and methamphetamine differentially affect dopamine  
678 transporters in vitro and in vivo. *J Biol Chem* **284**, 2978-2989,  
679 doi:10.1074/jbc.M805298200 (2009).

680 47 Saha, K. *et al.* Intracellular methamphetamine prevents the dopamine-induced  
681 enhancement of neuronal firing. *J Biol Chem* **289**, 22246-22257,  
682 doi:10.1074/jbc.M114.563056 (2014).

683 48 Greene, L. A. & Tischler, A. S. Establishment of a noradrenergic clonal line of rat adrenal  
684 pheochromocytoma cells which respond to nerve growth factor. *Proc Natl Acad Sci U S A*  
685 **73**, 2424-2428, doi:10.1073/pnas.73.7.2424 (1976).

686 49 Cartier, E. A. *et al.* A biochemical and functional protein complex involving dopamine  
687 synthesis and transport into synaptic vesicles. *J Biol Chem* **285**, 1957-1966,  
688 doi:10.1074/jbc.M109.054510 (2010).

689 50 Swant, J. *et al.* alpha-Synuclein stimulates a dopamine transporter-dependent chloride  
690 current and modulates the activity of the transporter. *J Biol Chem* **286**, 43933-43943,  
691 doi:10.1074/jbc.M111.241232 (2011).

692 51 Gopinath, A. *et al.* A novel approach to study markers of dopamine signaling in peripheral  
693 immune cells. *J Immunol Methods* **476**, 112686, doi:10.1016/j.jim.2019.112686 (2020).

694 52 Corkum, C. P. *et al.* Immune cell subsets and their gene expression profiles from human  
695 PBMC isolated by Vacutainer Cell Preparation Tube (CPT™) and standard density  
696 gradient. *BMC Immunol* **16**, 48, doi:10.1186/s12865-015-0113-0 (2015).

697 53 Flierl, M. A., Rittirsch, D., Huber-Lang, M., Sarma, J. V. & Ward, P. A. Catecholamines-  
698 crafty weapons in the inflammatory arsenal of immune/inflammatory cells or opening  
699 pandora's box? *Mol Med* **14**, 195-204, doi:10.2119/2007-00105.Flierl (2008).

700 54 Flierl, M. A. *et al.* Upregulation of phagocyte-derived catecholamines augments the acute  
701 inflammatory response. *PLoS One* **4**, e4414, doi:10.1371/journal.pone.0004414 (2009).

702 55 Torres, K. C. *et al.* Norepinephrine, dopamine and dexamethasone modulate discrete  
703 leukocyte subpopulations and cytokine profiles from human PBMC. *J Neuroimmunol* **166**,  
704 144-157, doi:10.1016/j.jneuroim.2005.06.006 (2005).

705 56 Kustrimovic, N. *et al.* Dopaminergic Receptors on CD4+ T Naive and Memory  
706 Lymphocytes Correlate with Motor Impairment in Patients with Parkinson's Disease. *Sci*  
707 *Rep* **6**, 33738, doi:10.1038/srep33738 (2016).

708 57 Bergquist, J., Tarkowski, A., Ekman, R. & Ewing, A. Discovery of endogenous  
709 catecholamines in lymphocytes and evidence for catecholamine regulation of lymphocyte  
710 function via an autocrine loop. *Proc Natl Acad Sci U S A* **91**, 12912-12916,  
711 doi:10.1073/pnas.91.26.12912 (1994).

712 58 Eugenin, E. A., Gaskill, P. J. & Berman, J. W. Tunneling nanotubes (TNT) are induced by  
713 HIV-infection of macrophages: a potential mechanism for intercellular HIV trafficking. *Cell*  
714 *Immunol* **254**, 142-148, doi:10.1016/j.cellimm.2008.08.005 (2009).

715 59 Nolan, R. & Gaskill, P. J. The role of catecholamines in HIV neuropathogenesis. *Brain Res*  
716 **1702**, 54-73, doi:10.1016/j.brainres.2018.04.030 (2019).

717 60 Nolan, R. A., Muir, R., Runner, K., Haddad, E. K. & Gaskill, P. J. Role of Macrophage  
718 Dopamine Receptors in Mediating Cytokine Production: Implications for  
719 Neuroinflammation in the Context of HIV-Associated Neurocognitive Disorders. *J*  
720 *Neuroimmune Pharmacol* **14**, 134-156, doi:10.1007/s11481-018-9825-2 (2019).

721 61 Merry, K. & Gowen, M. The transcriptional control of TGF-beta in human osteoblast-like  
722 cells is distinct from that of IL-1 beta. *Cytokine* **4**, 171-179, doi:10.1016/1043-  
723 4666(92)90052-s (1992).

724 62 Pickel, V. M., Joh, T. H., Field, P. M., Becker, C. G. & Reis, D. J. Cellular localization of  
725 tyrosine hydroxylase by immunohistochemistry. *J Histochem Cytochem* **23**, 1-12,  
726 doi:10.1177/23.1.234988 (1975).

727 63 Kastner, A., Hirsch, E. C., Herrero, M. T., Javoy-Agid, F. & Agid, Y. Immunocytochemical  
728 quantification of tyrosine hydroxylase at a cellular level in the mesencephalon of control  
729 subjects and patients with Parkinson's and Alzheimer's disease. *J Neurochem* **61**, 1024-  
730 1034, doi:10.1111/j.1471-4159.1993.tb03616.x (1993).

731 64 Yan, H. Q. *et al.* Delayed increase of tyrosine hydroxylase expression in rat nigrostriatal  
732 system after traumatic brain injury. *Brain Res* **1134**, 171-179,  
733 doi:10.1016/j.brainres.2006.11.087 (2007).

734 65 Witkovsky, P., Gabriel, R. & Krizaj, D. Anatomical and neurochemical characterization of  
735 dopaminergic interplexiform processes in mouse and rat retinas. *J Comp Neurol* **510**, 158-  
736 174, doi:10.1002/cne.21784 (2008).

737 66 Giguere, N. *et al.* Increased vulnerability of nigral dopamine neurons after expansion of  
738 their axonal arborization size through D2 dopamine receptor conditional knockout. *PLoS*  
739 *Genet* **15**, e1008352, doi:10.1371/journal.pgen.1008352 (2019).

740 67 Colon-Perez, L. M. *et al.* Functional connectivity, behavioral and dopaminergic alterations  
741 24 hours following acute exposure to synthetic bath salt drug methylenedioxypyrovalerone.  
742 *Neuropharmacology* **137**, 178-193, doi:10.1016/j.neuropharm.2018.04.031 (2018).

743 68 Contini, M. & Raviola, E. GABAergic synapses made by a retinal dopaminergic neuron.  
744 *Proc Natl Acad Sci U S A* **100**, 1358-1363, doi:10.1073/pnas.0337681100 (2003).

745 69 Feinstein, P., Bozza, T., Rodriguez, I., Vassalli, A. & Mombaerts, P. Axon guidance of  
746 mouse olfactory sensory neurons by odorant receptors and the beta2 adrenergic receptor.  
747 *Cell* **117**, 833-846, doi:10.1016/j.cell.2004.05.013 (2004).

748 70 Shaw, G., Morse, S., Ararat, M. & Graham, F. L. Preferential transformation of human  
749 neuronal cells by human adenoviruses and the origin of HEK 293 cells. *Faseb j* **16**, 869-  
750 871, doi:10.1096/fj.01-0995fje (2002).

751 71 Miller, D. R. *et al.* Methamphetamine regulation of activity and topology of ventral midbrain  
752 networks. *PLoS One* **14**, e0222957, doi:10.1371/journal.pone.0222957 (2019).

753 72 Trudeau, L. E. *et al.* The multilingual nature of dopamine neurons. *Prog Brain Res* **211**,  
754 141-164, doi:10.1016/b978-0-444-63425-2.00006-4 (2014).

755 73 Morales, M. & Margolis, E. B. Ventral tegmental area: cellular heterogeneity, connectivity  
756 and behaviour. *Nature Reviews Neuroscience* **18**, 73-85, doi:10.1038/nrn.2016.165  
757 (2017).

758 74 Caggiu, E. *et al.* Inflammation, Infectious Triggers, and Parkinson's Disease. *Front Neurol*  
759 **10**, 122, doi:10.3389/fneur.2019.00122 (2019).

760 75 Kozina, E. *et al.* Mutant LRRK2 mediates peripheral and central immune responses  
761 leading to neurodegeneration in vivo. *Brain* **141**, 1753-1769, doi:10.1093/brain/awy077  
762 (2018).

763 76 Rentzos, M. *et al.* Circulating interleukin-15 and RANTES chemokine in Parkinson's  
764 disease. *Acta Neurol Scand* **116**, 374-379, doi:10.1111/j.1600-0404.2007.00894.x (2007).

765 77 Brodacki, B. *et al.* Serum interleukin (IL-2, IL-10, IL-6, IL-4), TNFalpha, and INFgamma  
766 concentrations are elevated in patients with atypical and idiopathic parkinsonism. *Neurosci*  
767 *Lett* **441**, 158-162, doi:10.1016/j.neulet.2008.06.040 (2008).

768 78 Dufek, M. *et al.* Serum inflammatory biomarkers in Parkinson's disease. *Parkinsonism*  
769 *Relat Disord* **15**, 318-320, doi:10.1016/j.parkreldis.2008.05.014 (2009).

770 79 Deleidi, M. & Gasser, T. The role of inflammation in sporadic and familial Parkinson's  
771 disease. *Cell Mol Life Sci* **70**, 4259-4273, doi:10.1007/s00018-013-1352-y (2013).

772 80 Jenei-Lanzl, Z. *et al.* Anti-inflammatory effects of cell-based therapy with tyrosine  
773 hydroxylase-positive catecholaminergic cells in experimental arthritis. *Ann Rheum Dis* **74**,  
774 444-451, doi:10.1136/annrheumdis-2013-203925 (2015).

775 81 Miller, L. E., Grifka, J., Schölmerich, J. & Straub, R. H. Norepinephrine from synovial  
776 tyrosine hydroxylase positive cells is a strong indicator of synovial inflammation in  
777 rheumatoid arthritis. *J Rheumatol* **29**, 427-435 (2002).

778 82 Doll, D. N., Rellick, S. L., Barr, T. L., Ren, X. & Simpkins, J. W. Rapid mitochondrial  
779 dysfunction mediates TNF-alpha-induced neurotoxicity. *J Neurochem* **132**, 443-451,  
780 doi:10.1111/jnc.13008 (2015).

781 83 Giustarini, G. *et al.* Tissue influx of neutrophils and monocytes is delayed during  
782 development of trovafloxacin-induced tumor necrosis factor-dependent liver injury in mice.  
783 *J Appl Toxicol* **38**, 753-765, doi:10.1002/jat.3585 (2018).

784 84 Nakai, Y., Hamagaki, S., Takagi, R., Taniguchi, A. & Kurimoto, F. Plasma concentrations  
785 of tumor necrosis factor-alpha (TNF-alpha) and soluble TNF receptors in patients with  
786 anorexia nervosa. *J Clin Endocrinol Metab* **84**, 1226-1228, doi:10.1210/jcem.84.4.5589  
787 (1999).

788 85 Turner, D. A. *et al.* Physiological levels of TNFalpha stimulation induce stochastic  
789 dynamics of NF-kappaB responses in single living cells. *J Cell Sci* **123**, 2834-2843,  
790 doi:10.1242/jcs.069641 (2010).

791 86 Damas, P. *et al.* Tumor necrosis factor and interleukin-1 serum levels during severe sepsis  
792 in humans. *Crit Care Med* **17**, 975-978, doi:10.1097/00003246-198910000-00001 (1989).

793 87 Kim, K. H. & Sederstrom, J. M. Assaying Cell Cycle Status Using Flow Cytometry. *Curr*  
794 *Protoc Mol Biol* **111**, 28.26.21-28.26.11, doi:10.1002/0471142727.mb2806s111 (2015).

795 88 Pereira, J. R. *et al.* IL-6 serum levels are elevated in Parkinson's disease patients with  
796 fatigue compared to patients without fatigue. *J Neurol Sci* **370**, 153-156,  
797 doi:10.1016/j.jns.2016.09.030 (2016).

798 89 Seppi, K. *et al.* Update on treatments for nonmotor symptoms of Parkinson's disease-an  
799 evidence-based medicine review. *Mov Disord* **34**, 180-198, doi:10.1002/mds.27602  
800 (2019).

801 90 Lindqvist, D. *et al.* Non-motor symptoms in patients with Parkinson's disease - correlations  
802 with inflammatory cytokines in serum. *PLoS One* **7**, e47387,  
803 doi:10.1371/journal.pone.0047387 (2012).

804 91 Joers, V. *et al.* Microglia, inflammation and gut microbiota responses in a progressive  
805 monkey model of Parkinson's disease: A case series. *Neurobiol Dis* **144**, 105027,  
806 doi:10.1016/j.nbd.2020.105027 (2020).

807 92 O'Reilly, M. L. *et al.* Pharmacological Inhibition of Soluble Tumor Necrosis Factor-Alpha  
808 Two Weeks after High Thoracic Spinal Cord Injury Does Not Affect Sympathetic  
809 Hyperreflexia. *J Neurotrauma*, doi:10.1089/neu.2020.7504 (2021).

810  
811

812 **Figure 1. Establishing a reproducible quantitative Bio-ELISA to detect Tyrosine**  
813 **Hydroxylase.** A-D) TH is detectable in recombinant form and in PC12 crude lysate using affinity  
814 purified rabbit polyclonal TH antibody AB152 (Sigma), and antibodies selected for this ELISA,  
815 mouse monoclonal MCA-4H2 (EnCor) and rabbit polyclonal RPCA-TH (EnCor). E) Using  
816 AB152, we probed the lower threshold for TH detection *via* serial dilution of purified recombinant  
817 TH from 6ug/mL to 0.094ug/mL followed by Western blot and near-Infrared detection,  
818 considered to be a sensitive method for protein detection on Western blot. We demonstrate IR  
819 detection is reliable to a lower threshold of ~15ng TH. Below this limit, TH detection becomes  
820 unreliable with IR detection. F-H) In a series of stepwise experiments designed to increase  
821 ELISA sensitivity and decrease background, we achieved lower detection limits of 15pg/mL TH  
822 (H). Capture antibody and detection antibody in all three methods were MCA-4H2 (1:1,000  
823 dilution from 1mg/mL) and RPCA-TH (1:6,000 dilution from 1mg/mL). Schematic representation  
824 of each method shown on the left with representative standard curve on the right. F) Incubation  
825 with detection antibody followed by an HRP-conjugate secondary yielded a lower detection  
826 threshold of 125pg/mL. G) Addition of a tertiary layer using anti-rabbit biotin followed by Avidin-  
827 HRP improved lower detection threshold to 62.5pg/mL but resulted in increased background. H)  
828 Use of biotinylated detection antibody (RPCA-TH-biotin, 1:6,000 dilution from 1.65mg/mL)  
829 followed by avidin-HRP yielded the lowest detection threshold of 15 pg/mL, with maximum  
830 sensitivity and minimal background. F-H) Insets (red outline) shows magnified lower standard  
831 curve to illustrate sensitivity.

832 **Figure 2. Antibodies MCA-4H2 and RPCA-TH reliably detect both native and denatured**  
833 **TH in mouse and human tissue.** Human and murine brain sections (40um) were  
834 permeabilized, blocked and stained with primary antibodies (MCA-4H2 and RPCA-TH) followed  
835 by HRP-conjugated secondaries and detected using diaminobenzidine enhanced with nickel  
836 (NiDAB, grey-black). A) MCA-4H2 stains neuromelanin-expressing (brown) TH positive midbrain  
837 neurons and neuronal processes (grey-black) with no non-specific staining (secondary only, top

838 panel; isotype control, second panel) in both human and murine tissues. B) RPCA-TH shows  
839 similar highly specific staining of midbrain TH positive neurons, confirming antibody specificity.  
840 A & B) Human midbrain tissues shown as secondary-only and isotype controls exhibit  
841 endogenous neuromelanin (brown), not to be confused with immunostaining. C) Western blot  
842 analyses of murine and human striatal tissues reveal similarly specific detection of TH (~63kDa  
843 band) in both mouse and human, with minimal non-specific staining in negative control  
844 homogenate (parental CHO cell homogenate). (Left – MCA-4H2, right – RPCA-TH). D) Blocking  
845 peptide/absorption control followed by western blot detection with either RPCA-TH and MCA-  
846 4H2 confirms specificity of both antibodies for TH protein. HSP60 (loading control) is shown  
847 below and applies to C-D.

848 **Figure 3. Bio-ELISA reliably quantifies TH in PC12 cells, human macrophages and**  
849 **cultured murine dopamine neurons.** A) Using the Bio-ELISA shown in Figure 1G, we  
850 quantified TH in four relevant tissues and cultured cells: PC12 (positive control), HEK293  
851 (negative control), cultured human macrophages and cultured primary murine dopamine  
852 neurons. PC12 cells express very high levels of TH (<10ng TH / mg total protein) relative to  
853 human macrophages (~300 pg TH / mg total protein) and primary murine dopamine neurons  
854 (~700 pg TH / mg total protein). B) TH values are plotted on a representative standard curve for  
855 visual comparison, with inset magnifying the lower end of the standard curve. C) Calculations  
856 are shown by which raw TH concentration in ng/mL is normalized to total protein per sample.  
857 Samples included in A, each an independent biological replicate, are shown in C. Data are  
858 shown as  $\pm$ SEM.

859 **Figure 4. Absorption controls demonstrate specificity of TH Bio-ELISA.** A) Schematic  
860 layout of experimental conditions to assess absorption controls in contrast to optimized Bio-  
861 ELISA conditions using PC12 cell lysate. B) Representative standard curve shown to illustrate  
862 PC12 cells' TH concentration using optimized Bio-ELISA (blue arrow), absorbed capture  
863 antibody (MCA-4H2 preincubated with 20ug/mL recombinant TH, orange arrow), and absorbed

864 detection antibody (biotinylated RPCA-TH preincubated with 20ug/mL recombinant TH, green  
865 arrow). PC12 TH is undetectable after absorption of either capture or detection antibodies,  
866 confirming assay specificity.

867 **Figure 5. TH protein is increased in CD14+ monocytes isolated from PD patients.** Total  
868 CD14+ monocytes were magnetically isolated from 20 million freshly isolated PBMCs derived  
869 from whole blood of 11 PD patients and 11 healthy volunteers, immediately lysed in the  
870 presence of protease inhibitor and stored at -80°C. Following protein quantification, whole lysate  
871 from each sample was added to duplicate wells and assayed for concentration of TH. A)  
872 Monocytes isolated from PD patients express significantly greater quantity of TH compared to  
873 equivalent monocytes isolated from healthy control subjects (unpaired two-tailed T-test,  
874  $\alpha=0.05$ ,  $p<0.05$ ) B) Mean TH concentration for monocytes from PD patients plotted on a  
875 representative standard curve, with inset magnifying the lower end of the curve. C) Calculations  
876 are shown by which raw TH concentration in ng/mL is normalized to total protein per sample.  
877 Samples included in A, each an independent biological replicate, are shown in C. Data are  
878 shown as  $\pm$ SEM.

879 **Figure 6. TNF $\alpha$  increases number of TH+ monocytes and amount of TH protein per**  
880 **monocyte.** A) Total CD14+ monocytes were isolated using negative magnetic selection from 80  
881 million healthy donor PBMCs. Monocytes were seeded into a 6-well ultra-low-adherence plate at  
882 2 million cells per well, and treated with vehicle (media), TPA (100ng/mL, positive control),  
883 TNF $\alpha$  (17ng/mL), in duplicate. B) One duplicate was assayed by flow cytometry to detect TH-  
884 expressing monocytes, using counting beads as a reference value to quantify the number of  
885 TH+ cells. C) Number of TH+ cells were quantified as shown. D) Representative histogram  
886 showing one set of samples assayed for TH expressing monocytes following stimulation. E)  
887 Both TPA and TNF $\alpha$  induced significant increases in TH-expressing monocytes relative to  
888 vehicle, shown as fold-increase relative to vehicle (n=3 per group, one-way ANOVA,  $p<0.01$ ). F)

889 No increase in total monocytes per condition, relative to vehicle (n=3 per group, one-way  
890 ANOVA, n.s.). G) TH concentration in picograms per milligram total protein shows TNFA  
891 treatment results in significantly increased TH protein relative to vehicle and TPA (n=5-6 per  
892 group, one-way ANOVA,  $p < 0.001$ ). H) Mean TH protein level for monocytes treated with  
893 vehicle, TPA and TNF $\alpha$  are plotted on a representative standard curve, with the inset  
894 magnifying the lower end of the curve. I) Intracellular flow cytometry for Ki67 does not reveal  
895 significant differences between vehicle and TNF $\alpha$  treatment groups, confirming a lack of cell  
896 proliferation following TNF $\alpha$  treatment. Data are shown as  $\pm$ SEM.

897 **Figure 7. Inhibition of TNF $\alpha$  blocks increase in number of TH+ monocytes and amount of**  
898 **TH per monocyte.** A-B) Acutely isolated monocytes from three healthy donors were seeded at  
899 2 million cells per well in duplicate ultra-low-adherence plates, and treated with TNF $\alpha$   
900 (17ng/mL), XPro1595 (50ng/mL), IL6 (17ng/mL) or combinations thereof as indicated. C) In  
901 samples assayed by flow cytometry, using counting beads as a reference value to quantify the  
902 number of TH+ cells, co-incubation with TNF $\alpha$  and XPro1595 significantly reduced the number  
903 of TH+ monocytes relative to TNF $\alpha$  treatment alone. Treatment with IL6 or IL6 + XPro1595  
904 resulted in no significant change in the number of TH+ monocytes. Values are represented as  
905 fold change relative to vehicle (n=3 per group, one way ANOVA, \* $P < 0.05$ , \*\* $P < 0.01$ ). D) TH  
906 concentration (picogram per milligram total protein) significantly increases upon TNF $\alpha$   
907 treatment, and is reduced significantly to baseline levels following co-incubation with TNF $\alpha$  and  
908 XPro1595. Neither IL6 nor IL6+XPro1595 significantly increased TH quantity (n=3 per group,  
909 one way ANOVA, \* $P < 0.05$ ). Data are shown as  $\pm$ SEM.

910



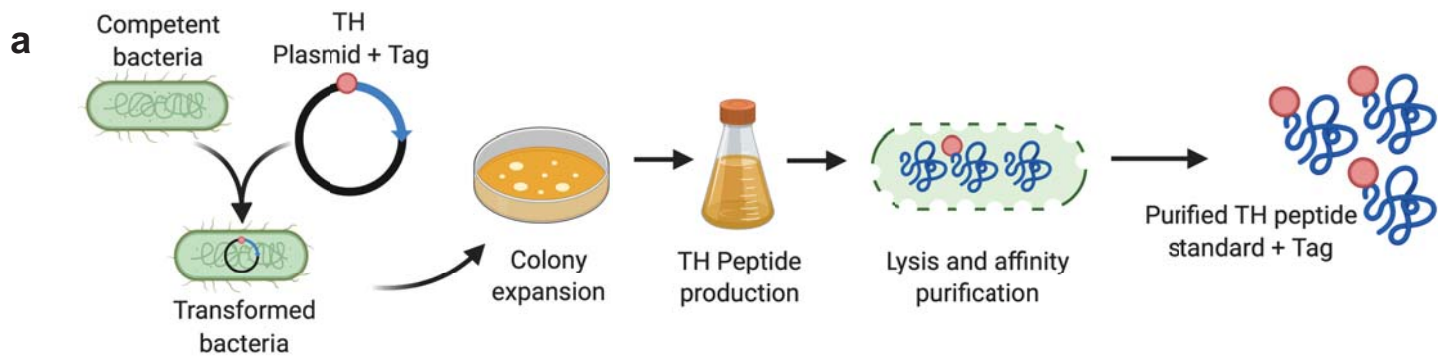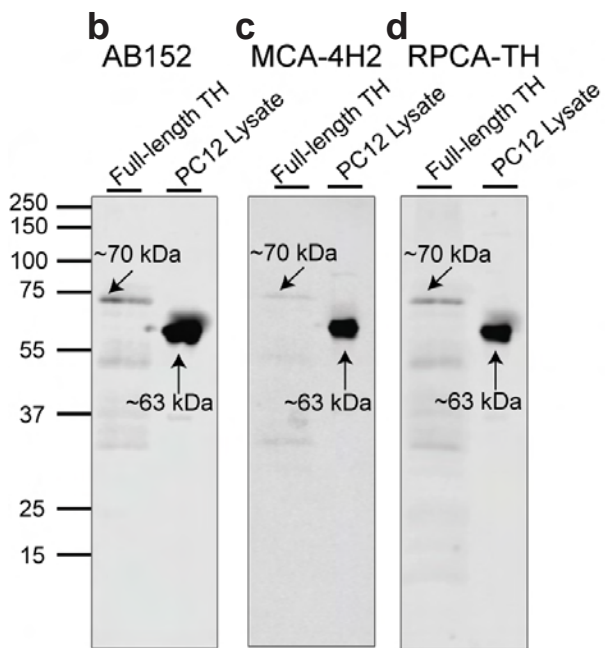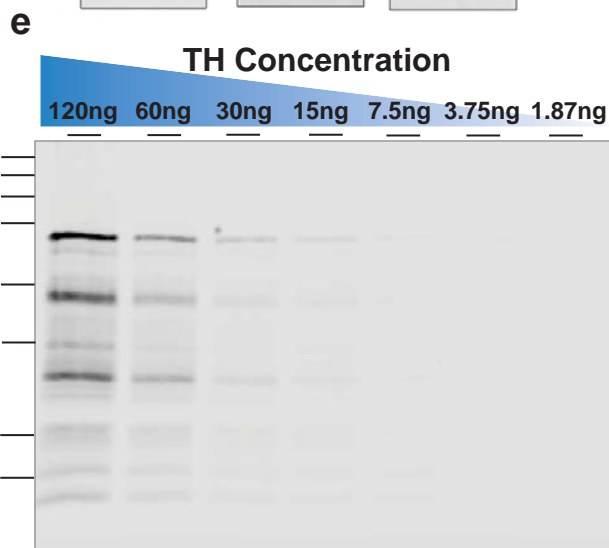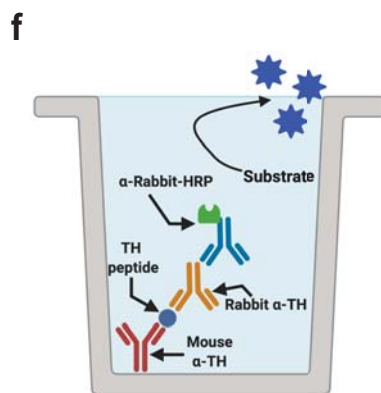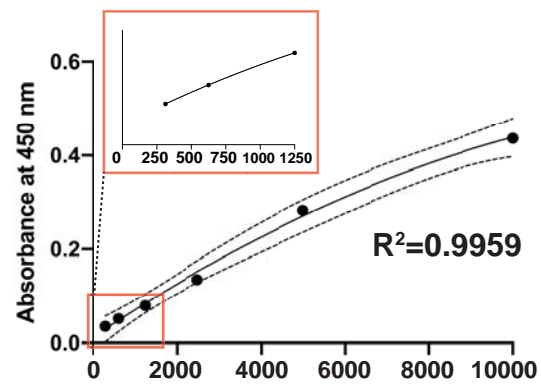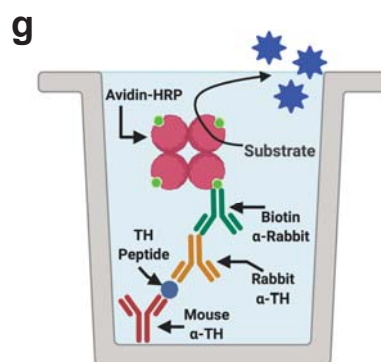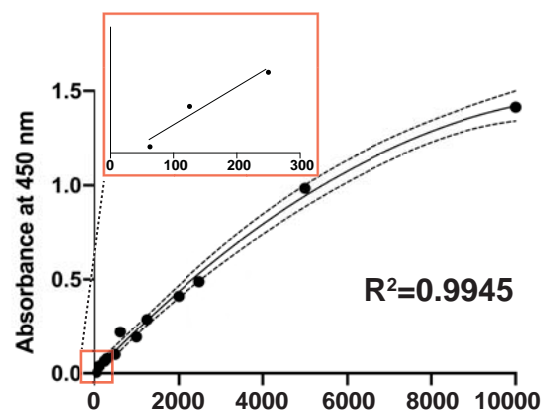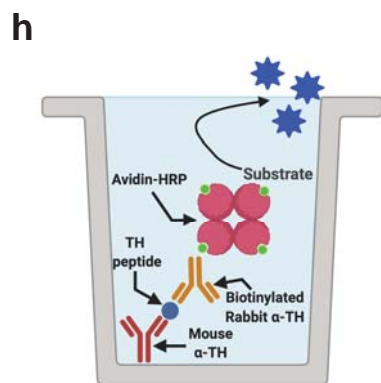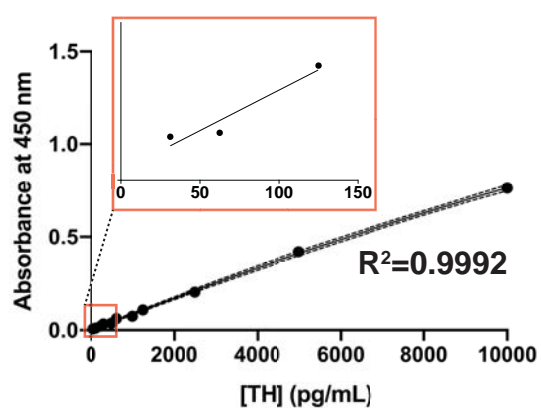

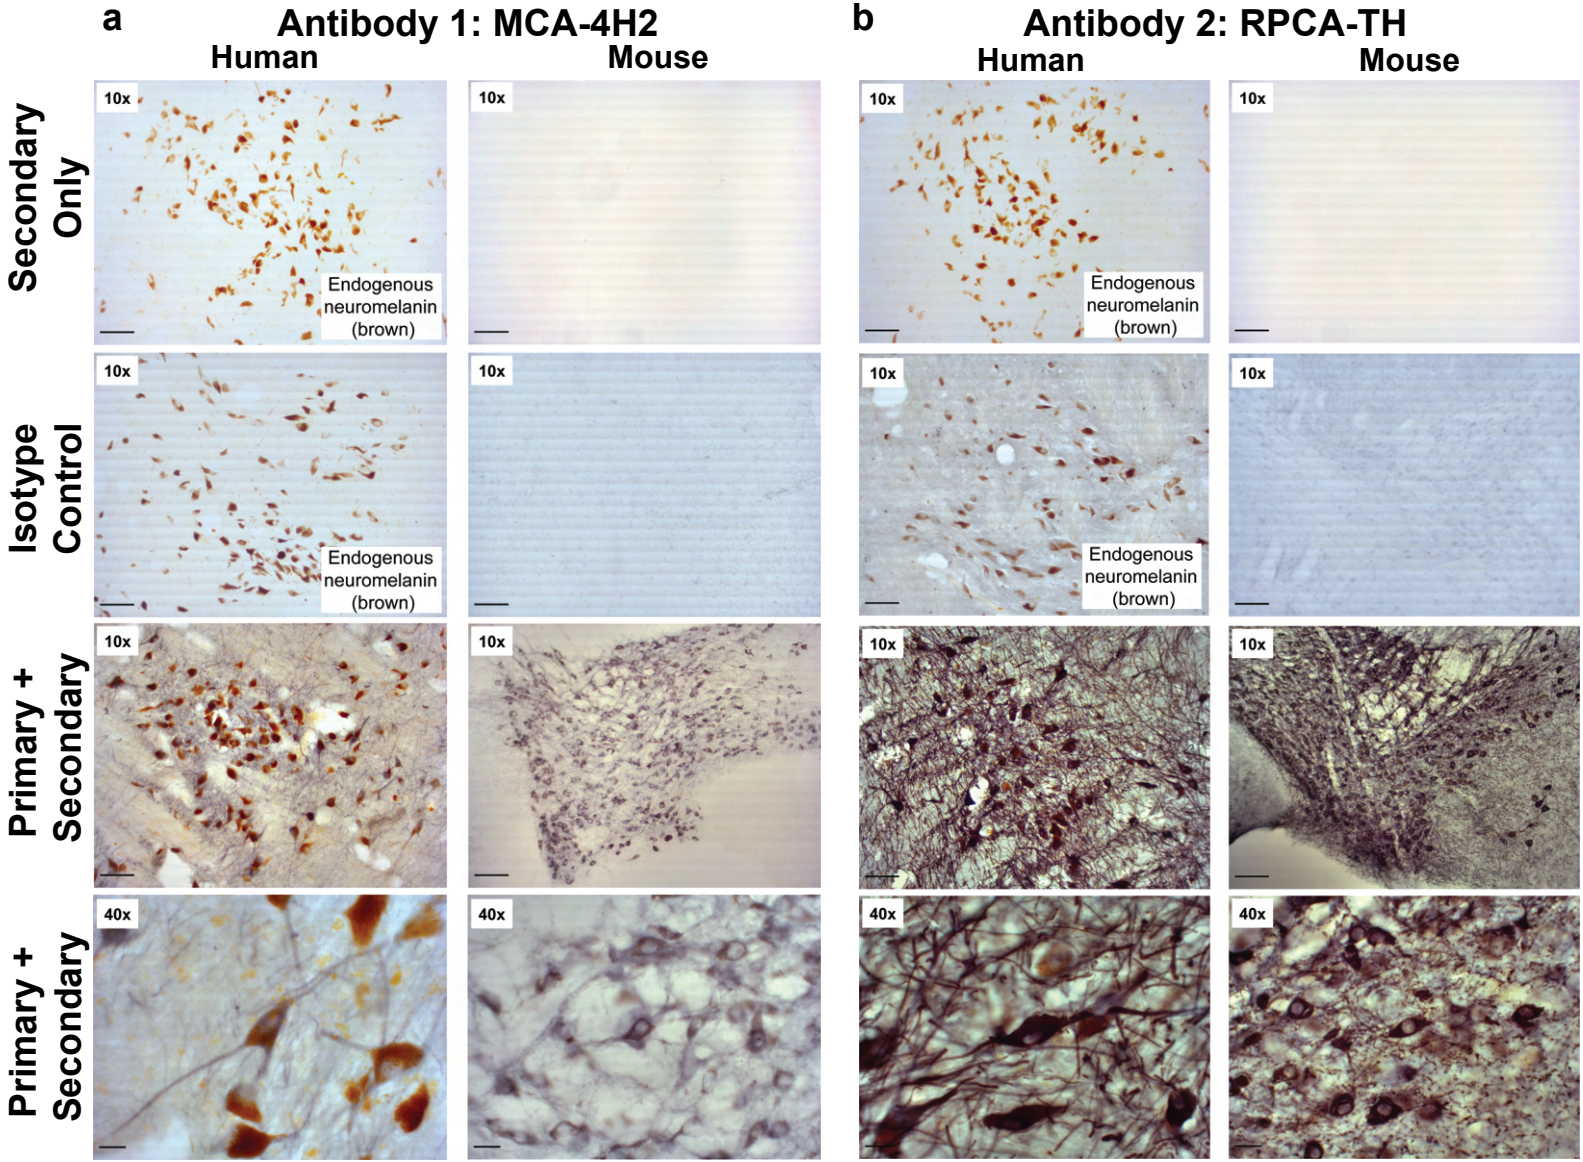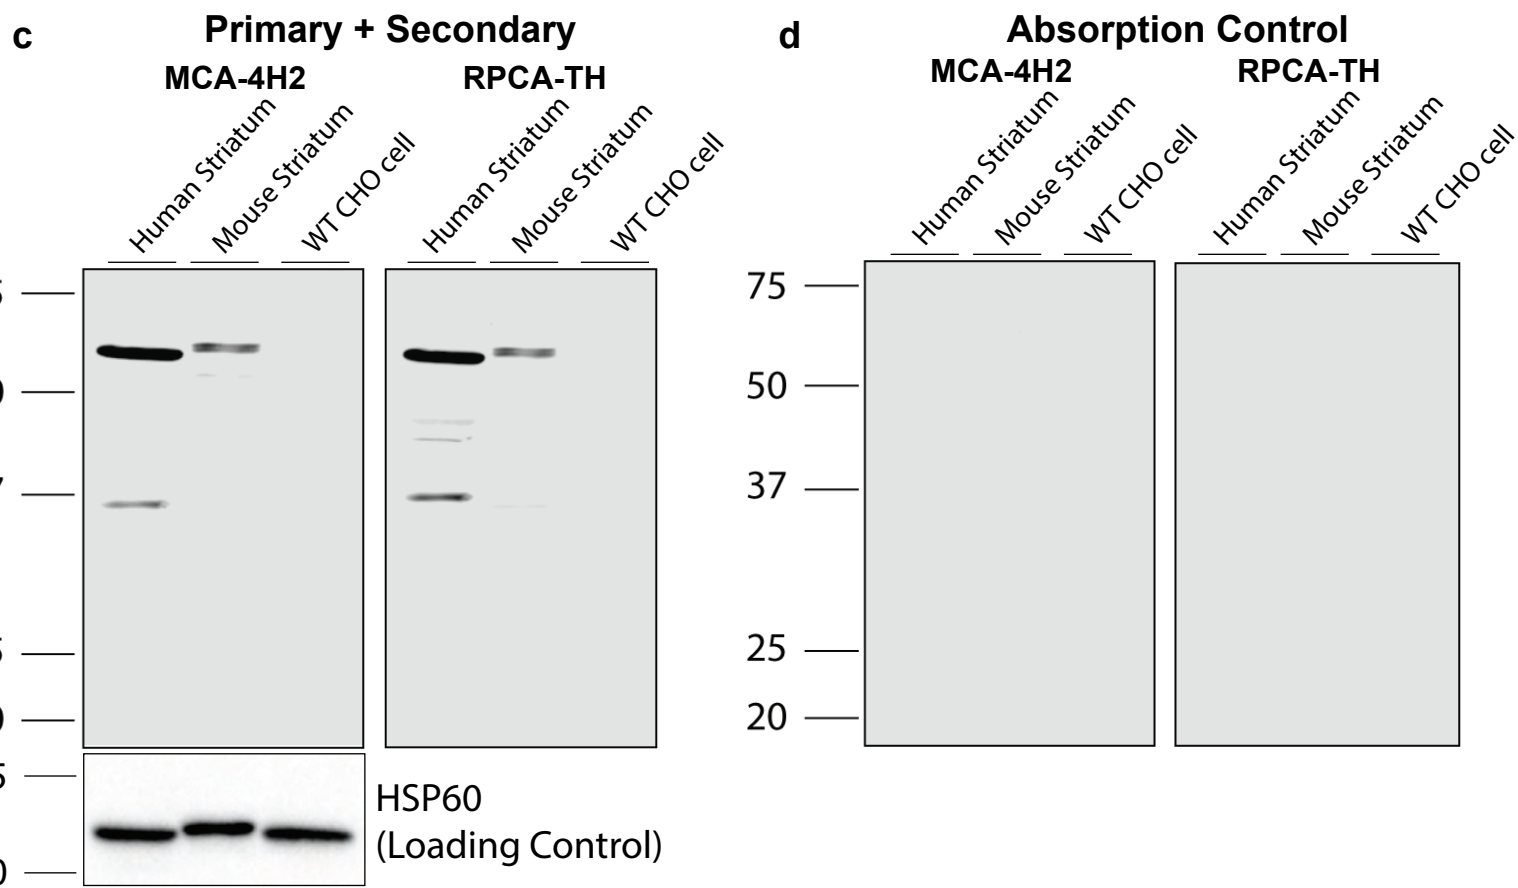



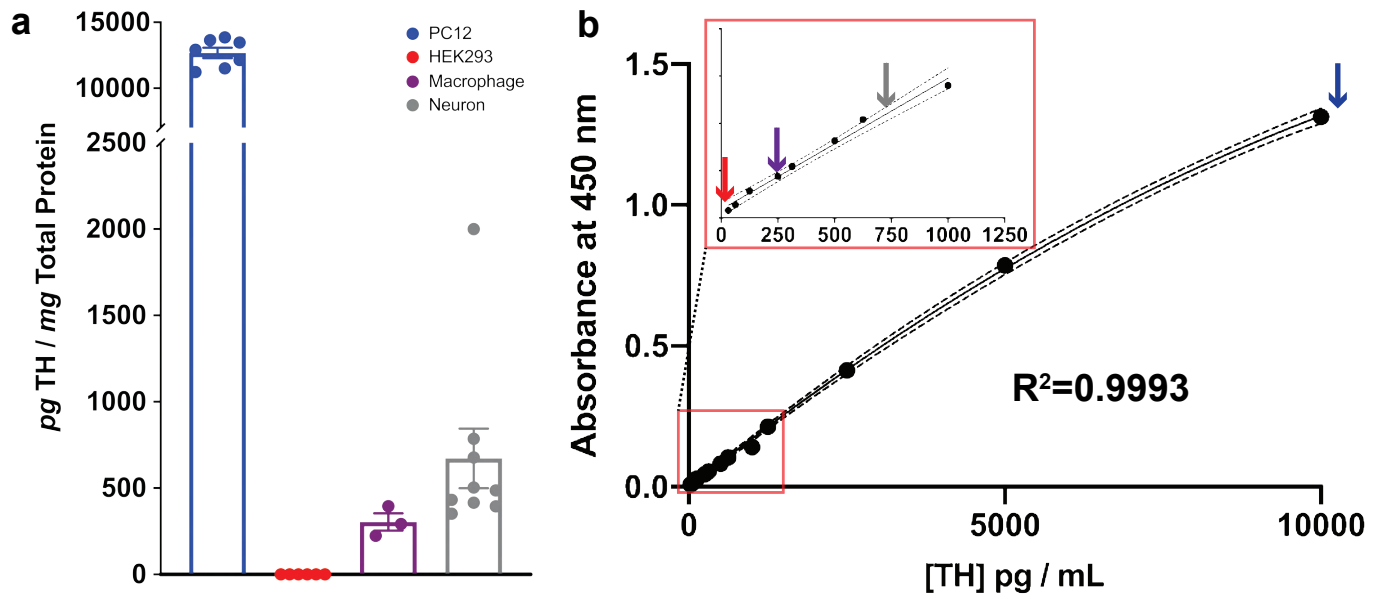

**C** TH Concentration Calculations in pg TH per mg Total Protein

| Sample ID  | [TH] ng/mL | [Protein] mg/mL | pg TH / mg Protein |
|------------|------------|-----------------|--------------------|
| PC12       | 24.552     | 1.800           | 13639.816          |
| PC12       | 15.365     | 1.190           | 12911.395          |
| PC12       | 24.158     | 2.100           | 11503.757          |
| PC12       | 20.208     | 1.800           | 11226.728          |
| PC12       | 24.232     | 1.800           | 13462.029          |
| PC12       | 21.850     | 1.800           | 12138.909          |
| PC12       | 24.870     | 1.800           | 13816.439          |
| HEK293     | N/D        | 2.900           | N/D                |
| HEK293     | N/D        | 1.000           | N/D                |
| HEK293     | N/D        | 1.000           | N/D                |
| HEK293     | N/D        | 1.000           | N/D                |
| HEK293     | N/D        | 1.000           | N/D                |
| HEK293     | N/D        | 1.000           | N/D                |
| Macrophage | 0.130      | 0.446           | 292.087            |
| Macrophage | 0.144      | 0.646           | 223.685            |
| Macrophage | 0.759      | 1.920           | 395.295            |
| Neuron     | 0.568      | 1.439           | 394.782            |
| Neuron     | 0.397      | 0.920           | 431.783            |
| Neuron     | 0.321      | 0.913           | 351.731            |
| Neuron     | 0.259      | 0.624           | 415.677            |
| Neuron     | 0.375      | 0.772           | 486.432            |
| Neuron     | 0.303      | 0.601           | 503.478            |
| Neuron     | 0.542      | 0.801           | 676.852            |
| Neuron     | 0.234      | 0.298           | 785.289            |
| Neuron     | 1.897      | 0.949           | 1999.383           |

**a**

| Absorption Control ELISA: Plate Map |   |                                    |   |   |   |           |   |                             |         |    |    |    |
|-------------------------------------|---|------------------------------------|---|---|---|-----------|---|-----------------------------|---------|----|----|----|
|                                     | 1 | 2                                  | 3 | 4 | 5 | 6         | 7 | 8                           | 9       | 10 | 11 | 12 |
| A                                   | 1 | Standard Curve                     |   |   |   | Bio-ELISA |   | TH protein absorbed MCA-4H2 | (Empty) |    |    |    |
| B                                   |   |                                    |   |   |   |           |   |                             |         |    |    |    |
| C                                   |   |                                    |   |   |   |           |   |                             |         |    |    |    |
| D                                   |   |                                    |   |   |   |           |   |                             |         |    |    |    |
| E                                   |   | TH protein absorbed Biotin-RPCA-TH |   |   |   |           |   |                             |         |    |    |    |
| F                                   |   |                                    |   |   |   |           |   |                             |         |    |    |    |
| G                                   |   | Blanks                             |   |   |   |           |   |                             |         |    |    |    |
| H                                   |   | (Empty)                            |   |   |   |           |   |                             |         |    |    |    |

**b**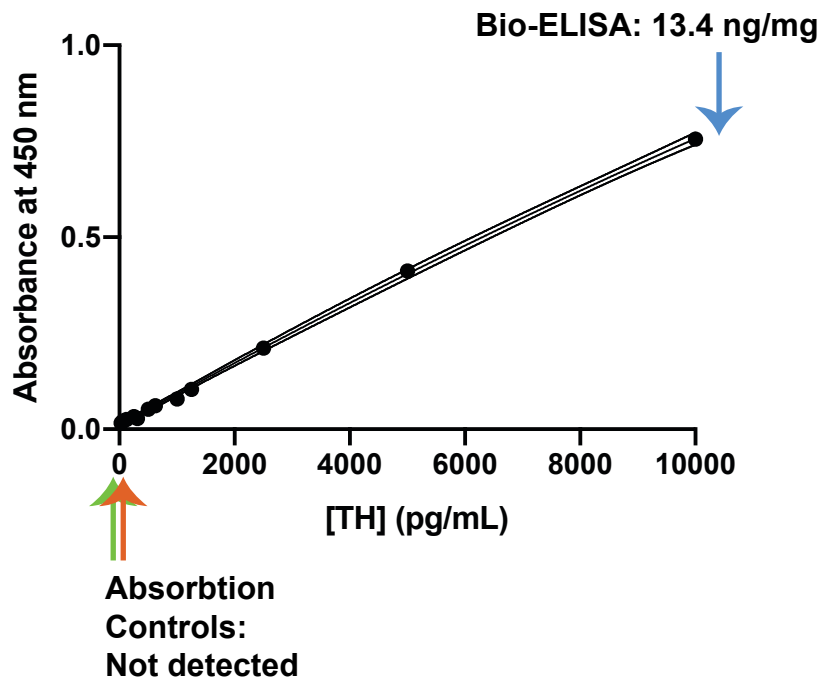

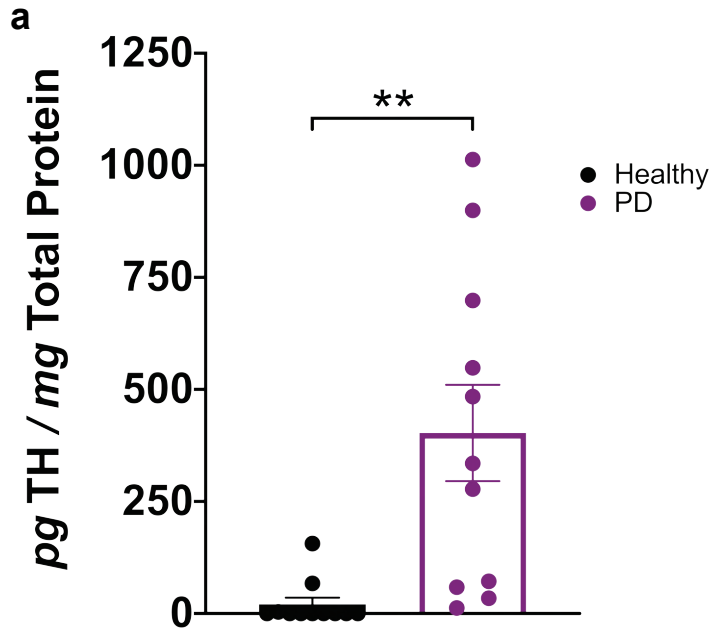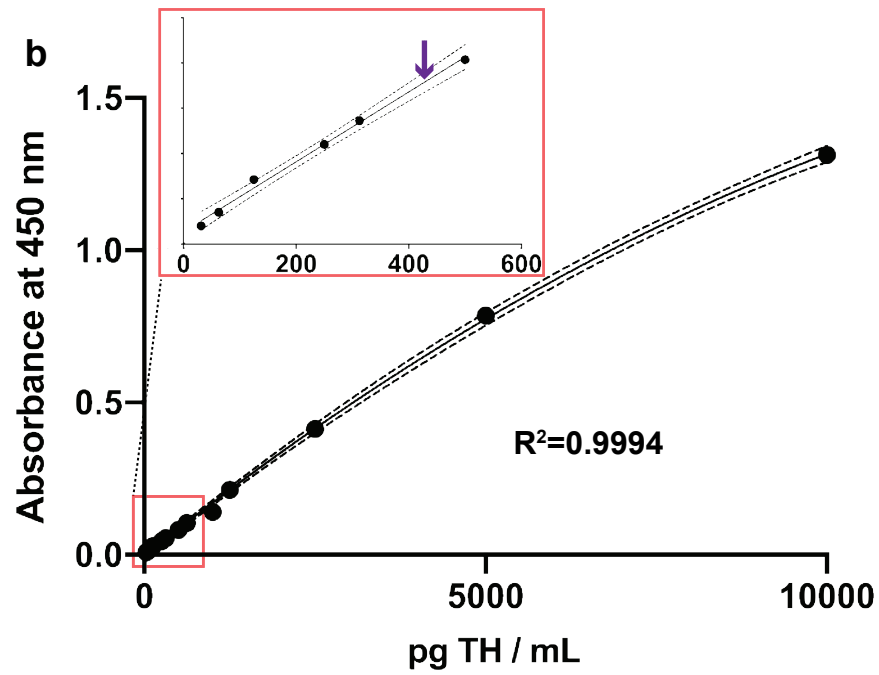

**c** TH concentration in CD14+ monocytes of Parkinson's disease patients relative to healthy controls

| Patient ID         | [TH]<br>ng/mL | [Protein]<br>mg/mL | pg TH / mg<br>Protein |
|--------------------|---------------|--------------------|-----------------------|
| Parkinson's 149    | 0.121         | 1.689              | 71.827                |
| Parkinson's 150    | 0.086         | 1.460              | 58.651                |
| Parkinson's 151    | 0.050         | 1.460              | 34.213                |
| Parkinson's 154    | 0.340         | 1.225              | 277.646               |
| Parkinson's 155    | 0.034         | 2.728              | 12.525                |
| Parkinson's 161    | 1.507         | 1.676              | 899.557               |
| Parkinson's 163    | 1.796         | 1.773              | 1012.918              |
| Parkinson's 164    | 1.137         | 2.074              | 548.146               |
| Parkinson's 165    | 1.713         | 2.452              | 698.632               |
| Parkinson's 166    | 1.013         | 2.093              | 484.033               |
| Parkinson's 167    | 0.643         | 1.918              | 334.909               |
| Healthy subject 1  | 0.099         | 1.471              | 67.305                |
| Healthy Subject 2  | 0.007         | 2.040              | 3.590                 |
| Healthy Subject 3  | N/D           | 1.209              | N/D                   |
| Healthy Subject 4  | N/D           | 1.047              | N/D                   |
| Healthy Subject 5  | N/D           | 1.809              | N/D                   |
| Healthy Subject 6  | N/D           | 1.671              | N/D                   |
| Healthy Subject 7  | N/D           | 1.178              | N/D                   |
| Healthy Subject 8  | N/D           | 2.164              | N/D                   |
| Healthy Subject 9  | 0.272         | 1.744              | 155.893               |
| Healthy Subject 10 | N/D           | 2.181              | N/D                   |
| Healthy Subject 11 | N/D           | 2.229              | N/D                   |

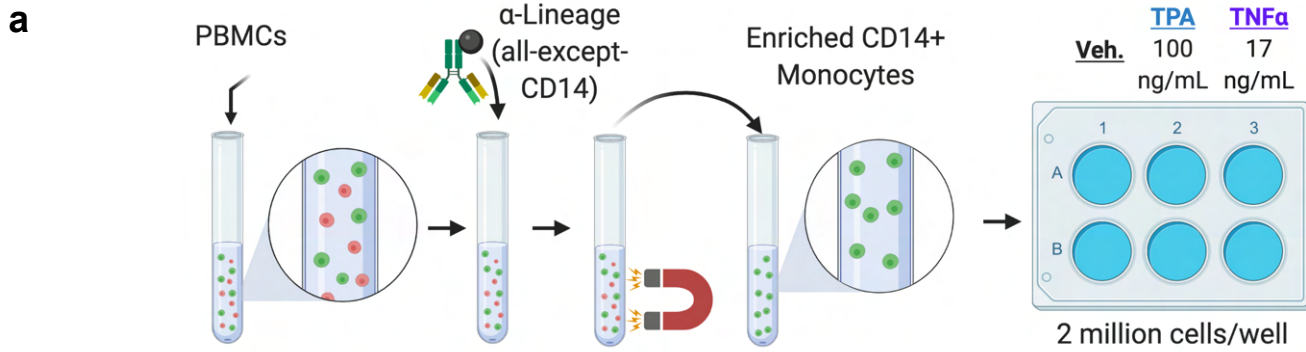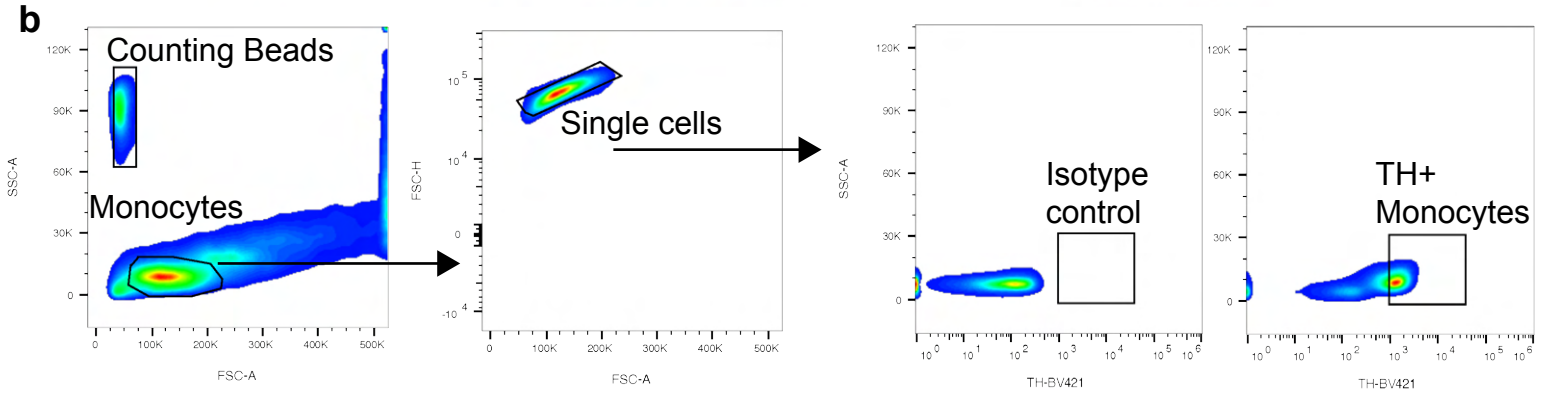

**c**

$$\frac{\# \text{ TH+ Cells}}{\# \text{ Beads}} \times \frac{5,000 \text{ beads}}{1,000 \text{ uL}} = \text{TH+ cells / uL}$$

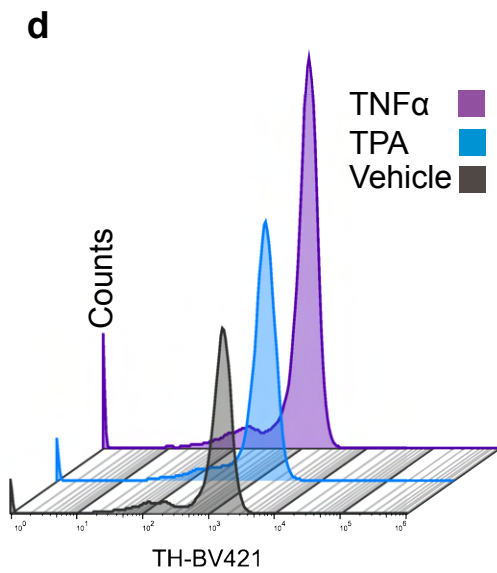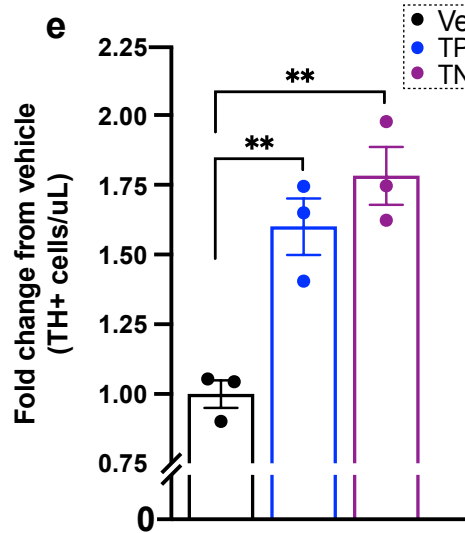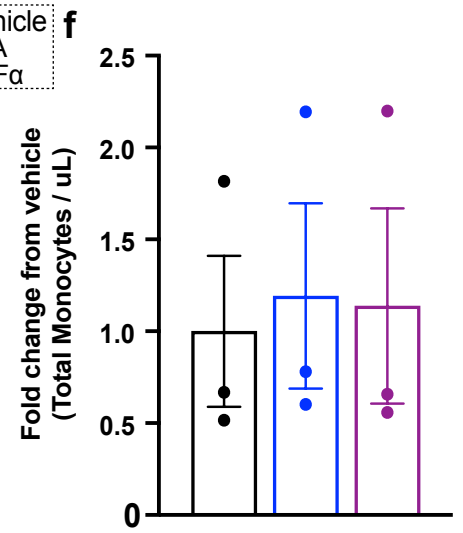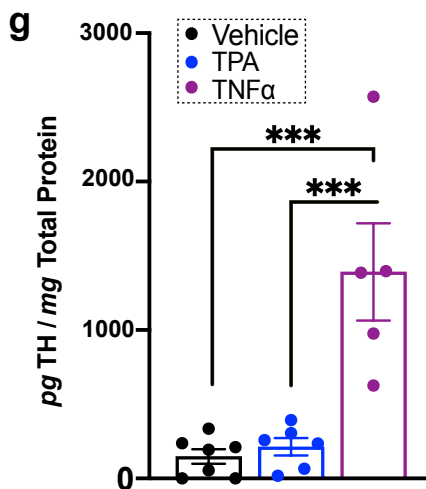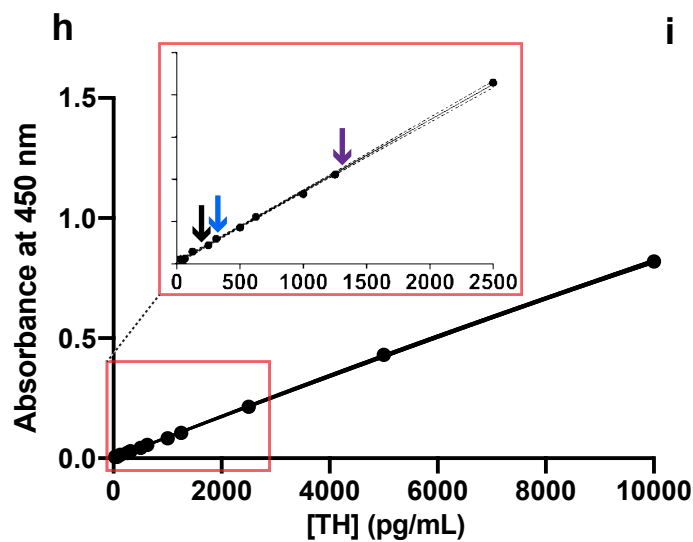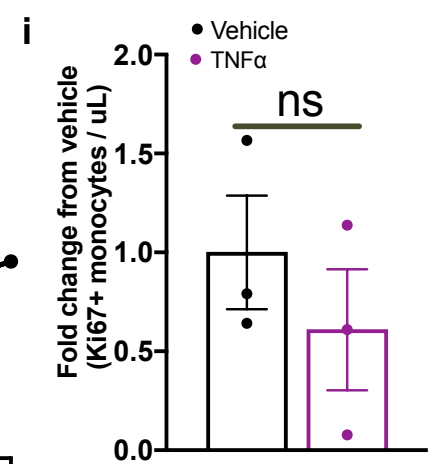

a

| Donor demographics |        |     |
|--------------------|--------|-----|
| Donor ID           | Gender | Age |
| #1                 | Male   | 77  |
| #2                 | Female | 69  |
| #3                 | Male   | 50  |

b

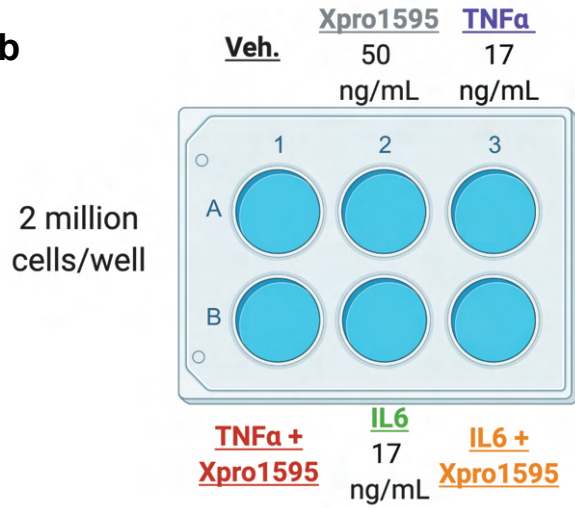

c

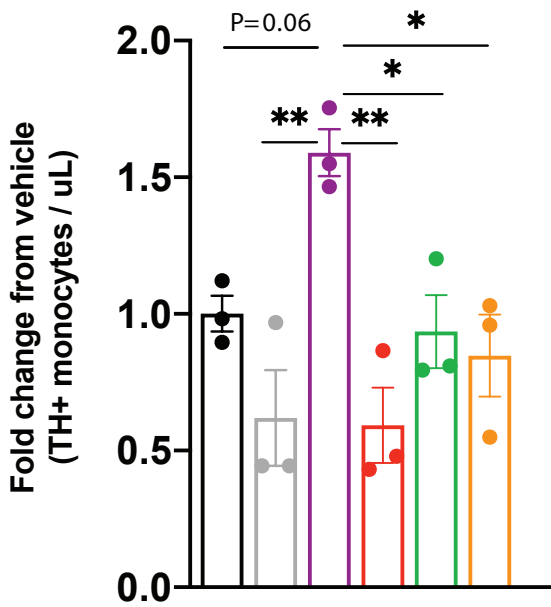

d

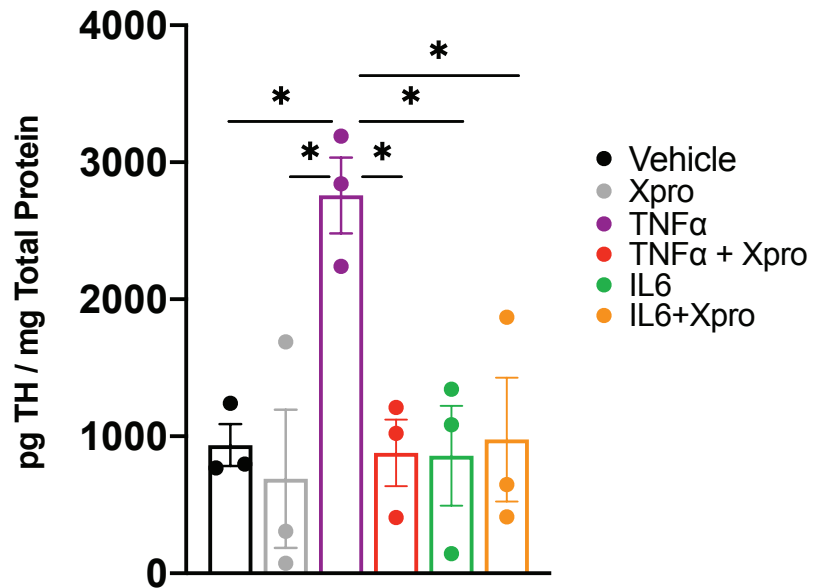

## Supplementary Figure 1

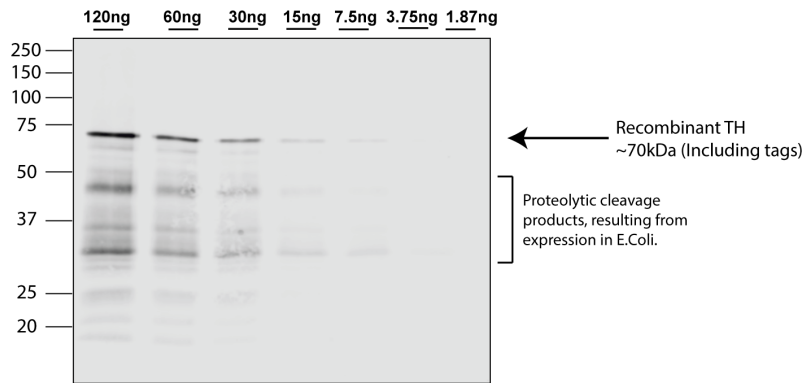

**Supplementary Figure 1. Lower molecular weight bands in recombinant TH protein are proteolytic cleavage products resulting from prokaryotic expression of TH protein. Similar to lower molecular weight bands seen in Figure 2, proteolytic cleavage is evident in recombinant TH protein assayed by western blot.**



## Supplementary Figure 2

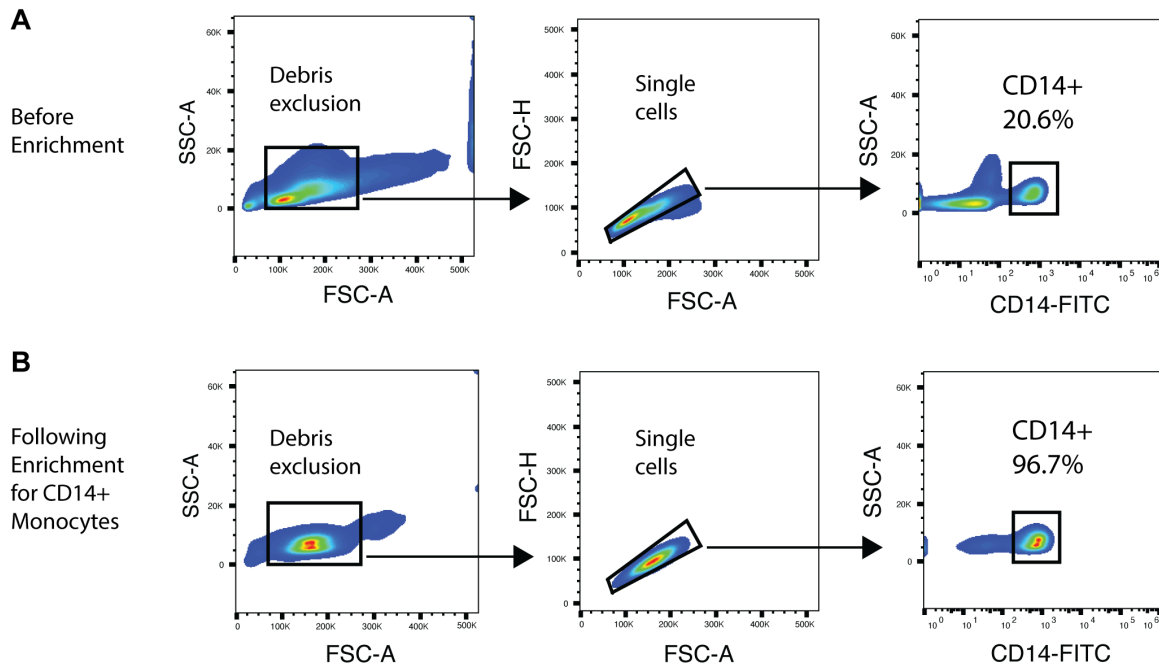

**Supplementary Figure 2. Enrichment for CD14+ monocytes from total PBMCs. A) Total PBMCs isolated from healthy donor whole blood shows ~20% CD14+ monocytes as a fraction of total PBMCs. B) Following magnetic selection (see methods), a highly enriched population of monocytes consisting of greater than 95% CD14+ monocytes is available for downstream cell culture treatments.**

**Supplementary Table 1**

| Supplementary Table 1: Clinical data for Parkinson's disease patients                                                                                      |                          |     |             |     |           |          |                  |                                                                      |
|------------------------------------------------------------------------------------------------------------------------------------------------------------|--------------------------|-----|-------------|-----|-----------|----------|------------------|----------------------------------------------------------------------|
| Patient ID                                                                                                                                                 | Disease Duration (Years) | Sex | Age (Years) | H-Y | UPDRS Off | UPDRS On | Other Conditions | Medications                                                          |
| Parkinson's 149                                                                                                                                            | 7                        | M   | 71          | 2   | 33        | --       | None             | Rytary, Ropinirole, Amantadine, Azilect, Apokyn                      |
| Parkinson's 150                                                                                                                                            | 9                        | M   | 50          | 2   | --        | 26       | None             | Sinemet, Selegiline, Mirapex                                         |
| Parkinson's 151                                                                                                                                            | 19                       | F   | 70          | 2   | 38        | 37       | RLS              | Sinemet, Pramipexole                                                 |
| Parkinson's 154                                                                                                                                            | 15                       | M   | 76          | --  | --        | --       | None             | Asprin, Sinemet, Klonopin, Rasagilline, Rigotine                     |
| Parkinson's 155                                                                                                                                            | 9                        | M   | 85          | 3   | --        | 25       | HTN, T2D         | Atorvastatin, Sinemet, Zetia, Losrtan, Metformin, Metoprolol, Flomax |
| Parkinson's 161                                                                                                                                            | 2                        | M   | 61          | 2   | --        | 33       | HTN              | Amantadine, Sinemet, Atorvastatin, Losartan, Metoprolol, Omeprazol   |
| Parkinson's 163                                                                                                                                            | 7                        | M   | 70          | 3   | 15        | --       | None             | Sinemet, Amantadine, Flomax, Ropinirole                              |
| Parkinson's 164                                                                                                                                            | 4                        | F   | 67          | --  | 17        | --       | None             | Atorvastatin, Sinemet, Fluoxetine, Ganapentin, Losartan              |
| Parkinson's 165                                                                                                                                            | 1                        | M   | 60          | 3   | --        | 23       | Arthritis        | Sinemet, Amantadine, Celebrex, Sertraline, Trazadone                 |
| Parkinson's 166                                                                                                                                            | 3                        | F   | 67          | 3   | --        | --       | None             | Sinemet, Tylenol                                                     |
| Parkinson's 167                                                                                                                                            | 6                        | M   | 59          | 2   | --        | 26       | T2D              | Sinemet, Asprin, Amlodipine, Metformin, Ibuprofen                    |
| Abbreviations: RLS (restless leg syndrome), HTN (hypertension), T2D ( type 2 diabetes), H-Y (Hoen Yar), UPDRS (universal Parkinson's disease rating scale) |                          |     |             |     |           |          |                  |                                                                      |

**Supplementary Table 1: Clinical data for Parkinson's disease patients. All PD patients and healthy control subjects were free from blood borne pathogens, viral/bacterial infections, had not been treated for infections within the preceding 21 days and were not taking blood thinners other than aspirin. Detailed medical histories for healthy control subjects were not available, other than those data presented. UPDRS Off represents Part 3 motor scores when subjects were not currently administered dopamine replenishment therapy (L-DOPA/Sinemet). UPDRS On represents Part 3 motor scores 30 minutes following dopamine replenishment therapy (L-DOPA/ Sinemet).**
